# Supplementary material for: A De Novo Genome Sequence Assembly of the Arabidopsis thaliana Accession Niederzenz-1 Displays Presence/Absence Variation and Strong Synteny
Source: PLoS One. 2016 Oct 6;11(10):e0164321. doi: 10.1371/journal.pone.0164321 (PMC5053417; doi:10.1371/journal.pone.0164321)
Supplement: S7 Table — Positions of predicted PAV between Col-0 and Nd-1 are listed. (XLSX) [file pone.0164321.s017.xlsx]

## Sheet: insertion_validation
S7 Table. Predicted PAV.
ID	Col-0 Chr	Col-0 Start	Col-0 End	Col-0 Length	Nd-1 Scaffold	Nd-1 Start	Nd-1 End	Nd-1 Length	PE read mapping distance support status
1	Chr1	41552	41567	15	scaffold53	41073	41303	230	confirmed
2	Chr1	103966	103999	33	scaffold53	102861	103808	947	confirmed
3	Chr1	518626	518664	38	scaffold53	517853	518171	318	confirmed
4	Chr1	520525	520551	26	scaffold53	520028	520492	464	confirmed
5	Chr1	609637	609670	33	scaffold53	610813	611038	225	confirmed
6	Chr1	768172	768174	2	scaffold53	769015	769426	411	confirmed
7	Chr1	822663	822678	15	scaffold5422	42911	43016	105	confirmed
8	Chr1	1170656	1170659	3	scaffold5422	388466	388568	102	confirmed
9	Chr1	1170656	1170659	3	scaffold5422	388679	388811	132	confirmed
10	Chr1	1170656	1170659	3	scaffold5422	388916	389020	104	confirmed
11	Chr1	1433208	1433213	5	scaffold5415	143247	143691	444	confirmed
12	Chr1	1564369	1564487	118	scaffold5415	271613	273544	1931	confirmed
13	Chr1	2299685	2299702	17	scaffold5415	1008993	1009282	289	confirmed
14	Chr1	2463048	2463050	2	scaffold5269	41694	42941	1247	confirmed
15	Chr1	2562324	2562337	13	scaffold5295	89194	89324	130	confirmed
16	Chr1	2951430	2951444	14	scaffold5295	469120	470319	1199	confirmed
17	Chr1	3300923	3301143	220	scaffold5295	815801	819849	4048	N/A
18	Chr1	3303742	3303945	203	scaffold203	11986	14601	2615	confirmed
19	Chr1	3605115	3605139	24	scaffold64	190399	190742	343	confirmed
20	Chr1	4000711	4000720	9	scaffold145	6675	6963	288	confirmed
21	Chr1	4072781	4072794	13	scaffold145	79492	79694	202	confirmed
22	Chr1	4132770	4132770	0	scaffold5255	37528	37932	404	confirmed
23	Chr1	4171445	4171511	66	scaffold5255	76872	77922	1050	confirmed
24	Chr1	4474552	4474553	1	scaffold5255	376105	376233	128	confirmed
25	Chr1	4474553	4474557	4	scaffold5255	376496	376707	211	confirmed
26	Chr1	4555183	4555198	15	scaffold5255	457311	457645	334	confirmed
27	Chr1	4581811	4581811	0	scaffold5255	484207	484362	155	unconfirmed
28	Chr1	4636067	4636072	5	scaffold5255	538404	538545	141	confirmed
29	Chr1	5205942	5205971	29	scaffold5255	1117446	1117745	299	confirmed
30	Chr1	5453154	5453159	5	scaffold5255	1353608	1354888	1280	confirmed
31	Chr1	5816759	5816765	6	scaffold5255	1715579	1715829	250	confirmed
32	Chr1	5854011	5854014	3	scaffold5255	1753103	1753210	107	confirmed
33	Chr1	6446410	6446431	21	scaffold5429	56290	56447	157	confirmed
34	Chr1	6457293	6457333	40	scaffold5429	66775	66985	210	confirmed
35	Chr1	6874398	6874401	3	scaffold5388	158884	159111	227	confirmed
36	Chr1	6928565	6928579	14	scaffold5388	213317	213550	233	confirmed
37	Chr1	6941847	6941852	5	scaffold5388	226792	227193	401	confirmed
38	Chr1	7090501	7090521	20	scaffold129	43410	43648	238	confirmed
39	Chr1	7173472	7173475	3	scaffold129	126592	126841	249	confirmed
40	Chr1	7272148	7272169	21	scaffold129	223372	223493	121	confirmed
41	Chr1	7766013	7766028	15	scaffold5202	412099	412391	292	confirmed
42	Chr1	7984354	7984394	40	scaffold5202	623362	623492	130	unconfirmed
43	Chr1	8317811	8317827	16	scaffold5280	27530	27831	301	confirmed
44	Chr1	8541487	8541636	149	scaffold5231	20571	28444	7873	confirmed
45	Chr1	8718228	8718232	4	scaffold5231	206316	206609	293	unconfirmed
46	Chr1	8767554	8767562	8	scaffold5464	1319	2343	1024	confirmed
47	Chr1	9280431	9280439	8	scaffold5352	194428	195636	1208	confirmed
48	Chr1	9768720	9768724	4	scaffold5352	661094	661831	737	confirmed
49	Chr1	9773974	9774265	291	scaffold5352	667092	670007	2915	confirmed
50	Chr4	5700068	5700072	4	scaffold5421	122430	124340	1910	confirmed
51	Chr1	10028059	10028072	13	scaffold164	18883	19458	575	confirmed
52	Chr1	10188075	10188085	10	scaffold54	95164	95439	275	confirmed
53	Chr1	10229113	10229190	77	scaffold54	137122	138002	880	confirmed
54	Chr1	10696661	10696673	12	scaffold5382	195404	199966	4562	confirmed
55	Chr1	10851292	10851297	5	scaffold5382	353553	353687	134	confirmed
56	Chr1	10854896	10854944	48	scaffold5382	357505	357630	125	confirmed
57	Chr1	10919048	10919074	26	scaffold5382	419916	420224	308	confirmed
58	Chr1	10965938	10965942	4	scaffold5384	36142	36782	640	confirmed
59	Chr1	11117846	11117867	21	scaffold5309	68315	68458	143	unconfirmed
60	Chr1	11129984	11129987	3	scaffold5309	80162	80331	169	confirmed
61	Chr1	11335776	11335787	11	scaffold5468	37099	38281	1182	confirmed
62	Chr1	11337941	11338009	68	scaffold5468	40352	41172	820	confirmed
63	Chr1	11338841	11338843	2	scaffold5468	42677	47191	4514	confirmed
64	Chr1	11348698	11348699	1	scaffold5468	57163	57451	288	confirmed
65	Chr1	11389918	11389936	18	scaffold5468	98132	98400	268	confirmed
66	Chr1	11441197	11441210	13	scaffold5468	147725	147856	131	confirmed
67	Chr1	11641966	11641969	3	scaffold5418	119814	119974	160	confirmed
68	Chr1	11764015	11764034	19	scaffold5458	106610	107149	539	confirmed
69	Chr1	11822963	11822969	6	scaffold5461	6547	6845	298	confirmed
70	Chr1	11881274	11881278	4	scaffold117	19347	20124	777	confirmed
71	Chr1	11951042	11951046	4	scaffold117	75576	80414	4838	confirmed
72	Chr1	11954217	11954231	14	scaffold117	83578	83709	131	unconfirmed
73	Chr1	12080721	12080725	4	scaffold84	92087	92364	277	confirmed
74	Chr1	12127576	12127579	3	scaffold84	139090	139211	121	unconfirmed
75	Chr1	12165057	12165065	8	scaffold84	177379	178169	790	confirmed
76	Chr1	12254305	12254647	342	scaffold200	1164	6393	5229	confirmed
77	Chr1	12280079	12280081	2	scaffold200	27657	28191	534	confirmed
78	Chr1	12565227	12565229	2	scaffold5424	32772	32885	113	confirmed
79	Chr1	12602277	12602279	2	scaffold5425	30149	30263	114	unconfirmed
80	Chr1	12707490	12707510	20	scaffold5471	68434	71102	2668	confirmed
81	Chr1	12735732	12735732	0	scaffold5288	2244	2717	473	confirmed
82	Chr1	13005216	13005237	21	scaffold5289	172507	172951	444	confirmed
83	Chr1	13047992	13047993	1	scaffold5289	215646	215866	220	unconfirmed
84	Chr1	13154157	13154166	9	scaffold5433	2999	3891	892	confirmed
85	Chr1	13261359	13261374	15	scaffold5336	75263	75445	182	confirmed
86	Chr1	13400546	13400548	2	scaffold5477	32283	32614	331	confirmed
87	Chr1	13448660	13448675	15	scaffold5477	70631	76939	6308	confirmed
88	Chr1	13449583	13449638	55	scaffold5477	77863	78536	673	confirmed
89	Chr1	13504259	13504263	4	scaffold378	23587	24032	445	confirmed
90	Chr1	13529817	13529822	5	scaffold234	16194	16782	588	confirmed
91	Chr2	3641974	3642003	29	scaffold467	14080	14262	182	confirmed
92	Chr1	13866260	13866260	0	scaffold202	27576	27794	218	confirmed
93	Chr1	13895431	13895439	8	scaffold202	48728	48956	228	confirmed
94	Chr1	13994016	13994017	1	scaffold240	50370	50704	334	unconfirmed
95	Chr1	14212693	14212699	6	scaffold914	292	542	250	confirmed
96	Chr1	14282719	14282721	2	scaffold308	24132	24809	677	confirmed
97	Chr1	14601309	14601309	0	scaffold850	8111	8614	503	confirmed
98	Chr1	14921136	14921143	7	scaffold405	19787	20902	1115	unconfirmed
99	Chr1	15582046	15582057	11	scaffold318	16780	17002	222	unconfirmed
100	Chr1	15887805	15887813	8	scaffold5274	2701	3400	699	confirmed
101	Chr1	15916990	15917003	13	scaffold5274	30182	30661	479	confirmed
102	Chr1	16105374	16105379	5	scaffold471	635	889	254	confirmed
103	Chr1	16160076	16160091	15	scaffold899	413	2376	1963	N/A
104	Chr1	16163679	16164288	609	scaffold431	3490	10534	7044	confirmed
105	Chr1	16178484	16178486	2	scaffold375	3775	3928	153	confirmed
106	Chr1	16281464	16281466	2	scaffold228	17823	18678	855	confirmed
107	Chr1	16324361	16324363	2	scaffold228	41808	43480	1672	confirmed
108	Chr1	16397294	16397304	10	scaffold465	9890	10175	285	confirmed
109	Chr1	16443477	16443477	0	scaffold177	52369	53039	670	confirmed
110	Chr1	16457610	16457613	3	scaffold177	67433	67633	200	confirmed
111	Chr1	16509682	16509688	6	scaffold177	121716	122623	907	confirmed
112	Chr1	16534256	16534257	1	scaffold261	5558	5915	357	confirmed
113	Chr1	16611738	16611753	15	scaffold516	17196	17359	163	confirmed
114	Chr1	16728916	16729044	128	scaffold179	3479	4943	1464	confirmed
115	Chr1	16729107	16729142	35	scaffold179	5007	6145	1138	confirmed
116	Chr1	16804320	16804343	23	scaffold179	87133	87753	620	confirmed
117	Chr1	16829367	16829389	22	scaffold179	110752	110874	122	confirmed
118	Chr1	16851601	16851618	17	scaffold193	5925	10244	4319	confirmed
119	Chr1	16896697	16896709	12	scaffold193	50366	51348	982	confirmed
120	Chr1	17021186	17021193	7	scaffold5251	46398	47811	1413	confirmed
121	Chr1	17117453	17117619	166	scaffold5456	6750	11012	4262	confirmed
122	Chr1	17147046	17147051	5	scaffold5456	37105	38406	1301	confirmed
123	Chr1	17147888	17147914	26	scaffold5456	39250	39433	183	unconfirmed
124	Chr1	17358129	17358140	11	scaffold5342	12471	12890	419	confirmed
125	Chr1	17729849	17729853	4	scaffold5330	155231	155972	741	confirmed
126	Chr1	17802772	17802775	3	scaffold5330	228801	228958	157	confirmed
127	Chr1	17997355	17997381	26	scaffold109	66338	66511	173	unconfirmed
128	Chr1	18088939	18088981	42	scaffold109	149774	149964	190	unconfirmed
129	Chr1	18117976	18117995	19	scaffold109	186529	191529	5000	confirmed
130	Chr1	18150378	18150383	5	scaffold5300	1243	2149	906	confirmed
131	Chr1	18273234	18273237	3	scaffold5354	96173	96299	126	confirmed
132	Chr1	18297468	18297475	7	scaffold5354	121362	122241	879	confirmed
133	Chr1	18398738	18398769	31	scaffold5354	221446	221583	137	confirmed
134	Chr1	18506837	18506846	9	scaffold5354	333835	333999	164	confirmed
135	Chr1	18819793	18819793	0	scaffold5303	188995	189835	840	confirmed
136	Chr1	18899066	18899078	12	scaffold94	59893	62389	2496	confirmed
137	Chr1	18905502	18905535	33	scaffold94	68819	69200	381	confirmed
138	Chr1	18984186	18984189	3	scaffold94	155082	155194	112	confirmed
139	Chr1	19018001	19018001	0	scaffold94	189225	189358	133	unconfirmed
140	Chr1	19368705	19368734	29	scaffold94	526063	526335	272	unconfirmed
141	Chr1	19431393	19431406	13	scaffold94	584240	584478	238	unconfirmed
142	Chr1	19470560	19470603	43	scaffold94	619620	624385	4765	confirmed
143	Chr1	19557628	19557628	0	scaffold94	713741	713921	180	confirmed
144	Chr1	19594033	19594047	14	scaffold94	750359	750892	533	confirmed
145	Chr1	19688540	19688540	0	scaffold94	849158	849334	176	unconfirmed
146	Chr1	19802985	19802993	8	scaffold5440	71776	72554	778	confirmed
147	Chr1	19925812	19925813	1	scaffold5440	196530	196718	188	confirmed
148	Chr1	20010479	20010481	2	scaffold5440	283119	283229	110	unconfirmed
149	Chr1	20042394	20042403	9	scaffold5440	315153	315413	260	confirmed
150	Chr1	20079100	20079105	5	scaffold5440	352092	352894	802	confirmed
151	Chr1	20153209	20153215	6	scaffold5440	404572	404982	410	confirmed
152	Chr1	20475428	20475430	2	scaffold5440	726425	726581	156	confirmed
153	Chr1	20505724	20505732	8	scaffold5440	756216	757525	1309	confirmed
154	Chr1	21063469	21063475	6	scaffold5333	209093	209438	345	confirmed
155	Chr1	21181043	21181046	3	scaffold592	335	476	141	confirmed
156	Chr1	21214840	21214853	13	scaffold422	35171	35306	135	confirmed
157	Chr1	21214840	21214853	13	scaffold422	35391	35672	281	confirmed
158	Chr1	21313464	21313466	2	scaffold5262	4768	5929	1161	confirmed
159	Chr1	21326657	21326702	45	scaffold5262	19002	19612	610	confirmed
160	Chr1	21327290	21327291	1	scaffold5262	20202	20340	138	confirmed
161	Chr1	21375324	21375349	25	scaffold5262	62734	62872	138	confirmed
162	Chr1	21386246	21386257	11	scaffold5262	74770	75438	668	confirmed
163	Chr1	21512361	21512368	7	scaffold5262	182333	182457	124	confirmed
164	Chr1	21579992	21579999	7	scaffold5262	241079	241926	847	confirmed
165	Chr1	21901642	21901672	30	scaffold5216	28589	28763	174	confirmed
166	Chr1	21949354	21949361	7	scaffold5216	84195	84694	499	confirmed
167	Chr1	22041949	22041960	11	scaffold5216	175810	176513	703	confirmed
168	Chr1	22091285	22091289	4	scaffold72	5212	5347	135	confirmed
169	Chr1	22108181	22108190	9	scaffold72	16064	16669	605	unconfirmed
170	Chr1	22245758	22245761	3	scaffold72	146245	146977	732	confirmed
171	Chr1	22291014	22291035	21	scaffold72	193278	193409	131	confirmed
172	Chr1	22294280	22294289	9	scaffold72	197003	197213	210	confirmed
173	Chr1	22589075	22589097	22	scaffold72	498557	498700	143	confirmed
174	Chr1	23257021	23257046	25	scaffold127	72274	72487	213	confirmed
175	Chr1	23486223	23486240	17	scaffold127	308102	308913	811	confirmed
176	Chr1	23506496	23506500	4	scaffold163	15934	17446	1512	confirmed
177	Chr1	23640719	23640752	33	scaffold16	62456	62613	157	confirmed
178	Chr1	23682292	23682302	10	scaffold16	103632	104163	531	confirmed
179	Chr1	23984628	23984629	1	scaffold16	418649	418776	127	confirmed
180	Chr1	24111662	24111664	2	scaffold16	546255	546365	110	confirmed
181	Chr1	24201231	24201231	0	scaffold16	635798	636044	246	confirmed
182	Chr1	24742803	24742809	6	scaffold139	147686	147967	281	confirmed
183	Chr1	25181563	25181570	7	scaffold13	279602	279761	159	confirmed
184	Chr1	25298450	25298452	2	scaffold13	398474	398733	259	confirmed
185	Chr1	25428891	25428950	59	scaffold13	530908	531515	607	confirmed
186	Chr1	25445704	25445715	11	scaffold13	548404	548680	276	confirmed
187	Chr1	25999294	25999307	13	scaffold13	1106787	1107361	574	confirmed
188	Chr1	26247815	26248309	494	scaffold13	1361847	1368927	7080	unconfirmed
189	Chr1	26284346	26284346	0	scaffold13	1404573	1405619	1046	confirmed
190	Chr1	26740764	26740765	1	scaffold13	1857835	1858492	657	confirmed
191	Chr1	26943850	26943965	115	scaffold13	2050661	2052503	1842	confirmed
192	Chr1	27008372	27008409	37	scaffold13	2116936	2117108	172	confirmed
193	Chr1	27145827	27145834	7	scaffold13	2254514	2254736	222	confirmed
194	Chr1	27389252	27389259	7	scaffold13	2498455	2498859	404	confirmed
195	Chr1	27527717	27527730	13	scaffold29	92675	92806	131	confirmed
196	Chr1	27550202	27550205	3	scaffold29	115528	115642	114	confirmed
197	Chr1	27571794	27571801	7	scaffold29	138103	138287	184	confirmed
198	Chr1	27830647	27830663	16	scaffold29	397998	398167	169	confirmed
199	Chr1	29163740	29163741	1	scaffold33	637688	637922	234	confirmed
200	Chr1	29381229	29381250	21	scaffold33	852397	852676	279	confirmed
201	Chr1	29603116	29603116	0	scaffold33	1074253	1074922	669	confirmed
202	Chr1	29694416	29694465	49	scaffold33	1166271	1166450	179	confirmed
203	Chr1	29716478	29716503	25	scaffold33	1188516	1188745	229	confirmed
204	Chr1	29830857	29830882	25	scaffold33	1302337	1302444	107	confirmed
205	Chr1	30113650	30113656	6	scaffold5222	272717	272899	182	confirmed
206	Chr1	30287572	30287656	84	scaffold5222	445486	447240	1754	confirmed
207	Chr1	30297571	30297606	35	scaffold5222	457181	457323	142	confirmed
208	Chr2	168503	168511	8	scaffold121	106528	107260	732	confirmed
209	Chr2	382914	382917	3	scaffold92	82551	84125	1574	confirmed
210	Chr2	467350	467378	28	scaffold92	167621	167792	171	confirmed
211	Chr2	654030	654043	13	scaffold92	351015	351166	151	confirmed
212	Chr2	1178619	1178619	0	scaffold222	50079	50199	120	confirmed
213	Chr2	1226802	1226807	5	scaffold222	99442	100051	609	confirmed
214	Chr2	1286273	1286285	12	scaffold5215	36681	42090	5409	confirmed
215	Chr2	1287846	1287863	17	scaffold5215	43928	45419	1491	confirmed
216	Chr2	1292561	1292580	19	scaffold5215	49717	50558	841	confirmed
217	Chr2	1310540	1310548	8	scaffold5215	68307	68651	344	unconfirmed
218	Chr2	1356277	1356312	35	scaffold185	38856	41776	2920	confirmed
219	Chr2	1366158	1366166	8	scaffold185	52511	53947	1436	confirmed
220	Chr2	1382526	1382547	21	scaffold185	59418	59614	196	confirmed
221	Chr2	1423168	1423168	0	scaffold185	91462	92160	698	confirmed
222	Chr2	1470989	1470993	4	scaffold185	138987	143543	4556	confirmed
223	Chr2	1619586	1619632	46	scaffold104	71437	71599	162	unconfirmed
224	Chr2	1648951	1648956	5	scaffold104	96144	96410	266	confirmed
225	Chr2	1687995	1688011	16	scaffold104	136347	142026	5679	confirmed
226	Chr2	1694726	1694728	2	scaffold104	148720	150053	1333	confirmed
227	Chr2	1695963	1695968	5	scaffold104	151299	151625	326	confirmed
228	Chr2	1989017	1989112	95	scaffold196	41232	42814	1582	confirmed
229	Chr2	1991285	1991293	8	scaffold196	45283	45624	341	confirmed
230	Chr2	2028974	2028981	7	scaffold196	73268	73512	244	confirmed
231	Chr2	2174381	2174390	9	scaffold137	104027	104264	237	unconfirmed
232	Chr2	2320645	2320650	5	scaffold254	35429	35559	130	unconfirmed
233	Chr2	2427951	2427974	23	scaffold362	21070	21211	141	confirmed
234	Chr2	2529075	2529078	3	scaffold224	16911	24267	7356	confirmed
235	Chr2	2807579	2807581	2	scaffold296	13867	14337	470	unconfirmed
236	Chr2	2834871	2834873	2	scaffold531	1500	1616	116	confirmed
237	Chr2	2973603	2973607	4	scaffold198	61821	62060	239	confirmed
238	Chr2	2983893	2983895	2	scaffold198	72396	73110	714	confirmed
239	Chr2	3806895	3806895	0	scaffold343	32110	32479	369	confirmed
240	Chr2	4076558	4076611	53	scaffold307	18743	19285	542	confirmed
241	Chr2	4137311	4137313	2	scaffold307	55025	56071	1046	confirmed
242	Chr2	4215745	4215751	6	scaffold356	18551	19013	462	confirmed
243	Chr2	4255855	4255857	2	scaffold978	887	1521	634	confirmed
244	Chr2	4279351	4279355	4	scaffold189	20869	20984	115	confirmed
245	Chr2	4280911	4280917	6	scaffold189	22546	23386	840	confirmed
246	Chr2	4438010	4438096	86	scaffold272	34533	35481	948	confirmed
247	Chr2	4452408	4452414	6	scaffold199	33526	33803	277	confirmed
248	Chr2	4470371	4470372	1	scaffold199	50943	51642	699	confirmed
249	Chr2	4538474	4538507	33	scaffold199	73989	74136	147	confirmed
250	Chr2	4646274	4646279	5	scaffold5210	31080	31872	792	confirmed
251	Chr2	4658414	4658415	1	scaffold5210	45163	47089	1926	confirmed
252	Chr2	4797895	4797909	14	scaffold144	21596	22674	1078	confirmed
253	Chr2	4826746	4826749	3	scaffold144	51569	52496	927	confirmed
254	Chr2	4393580	4393581	1	scaffold952	767	872	105	confirmed
255	Chr4	4636556	4636562	6	scaffold404	730	1308	578	confirmed
256	Chr2	4972225	4972229	4	scaffold353	19071	19879	808	confirmed
257	Chr2	5039677	5039681	4	scaffold371	44995	45216	221	confirmed
258	Chr2	5077104	5077105	1	scaffold267	16595	17261	666	confirmed
259	Chr2	5081659	5081660	1	scaffold267	22293	23524	1231	confirmed
260	Chr2	5406942	5407113	171	scaffold226	26757	33308	6551	confirmed
261	Chr2	5589106	5589151	45	scaffold265	40629	40735	106	unconfirmed
262	Chr2	5624096	5624097	1	scaffold265	70225	70412	187	confirmed
263	Chr2	5629861	5629870	9	scaffold90	3142	3506	364	confirmed
264	Chr2	5636834	5636891	57	scaffold90	7305	11894	4589	confirmed
265	Chr2	5685723	5685723	0	scaffold90	52981	56749	3768	confirmed
266	Chr2	6200956	6200961	5	scaffold5444	63566	63672	106	confirmed
267	Chr2	6350161	6350170	9	scaffold147	5459	5572	113	confirmed
268	Chr2	6361699	6361703	4	scaffold147	17050	17529	479	confirmed
269	Chr2	6550570	6550571	1	scaffold147	209118	209629	511	confirmed
270	Chr2	6646961	6647098	137	scaffold147	260761	263405	2644	confirmed
271	Chr2	6684910	6685105	195	scaffold147	291245	293912	2667	confirmed
272	Chr2	6697845	6697877	32	scaffold415	5882	6299	417	N/A
273	Chr1	12729332	12729348	16	scaffold5287	11837	11994	157	confirmed
274	Chr1	12731170	12731170	0	scaffold5287	13820	13988	168	confirmed
275	Chr2	6753925	6753939	14	scaffold1157	487	706	219	confirmed
276	Chr2	6827357	6827373	16	scaffold5214	17742	23116	5374	confirmed
277	Chr2	6827778	6827784	6	scaffold5214	23545	23985	440	confirmed
278	Chr2	6830547	6830558	11	scaffold5214	26745	28253	1508	confirmed
279	Chr2	6875377	6875379	2	scaffold5214	72933	73037	104	N/A
280	Chr2	7077402	7077431	29	scaffold77	11097	11204	107	unconfirmed
281	Chr2	7095079	7095116	37	scaffold77	49058	49204	146	confirmed
282	Chr2	7238476	7238479	3	scaffold77	191304	191482	178	unconfirmed
283	Chr2	7320113	7320118	5	scaffold77	273215	273417	202	unconfirmed
284	Chr2	7369143	7369146	3	scaffold77	321589	324677	3088	confirmed
285	Chr2	7382707	7382745	38	scaffold77	338210	338492	282	confirmed
286	Chr2	7408254	7408264	10	scaffold77	364497	364608	111	confirmed
287	Chr2	7427137	7427143	6	scaffold77	384031	384342	311	confirmed
288	Chr2	7522004	7522007	3	scaffold77	477966	479167	1201	confirmed
289	Chr2	7539359	7539361	2	scaffold77	496375	496693	318	confirmed
290	Chr2	7727622	7727633	11	scaffold77	675028	675144	116	unconfirmed
291	Chr2	7739724	7739726	2	scaffold77	687073	687217	144	unconfirmed
292	Chr2	7765434	7765439	5	scaffold77	712310	712550	240	confirmed
293	Chr2	7871206	7871207	1	scaffold77	811078	811199	121	confirmed
294	Chr2	8105885	8105901	16	scaffold5246	43803	43938	135	confirmed
295	Chr2	8106642	8106651	9	scaffold5246	44717	44849	132	confirmed
296	Chr2	8298930	8298947	17	scaffold49	40726	41527	801	confirmed
297	Chr2	8402681	8402682	1	scaffold49	138143	138365	222	confirmed
298	Chr2	8450157	8450173	16	scaffold49	184980	185126	146	confirmed
299	Chr2	8544417	8544443	26	scaffold49	280801	280922	121	confirmed
300	Chr2	8552209	8552210	1	scaffold49	288976	289127	151	confirmed
301	Chr2	8866903	8866907	4	scaffold49	593960	594263	303	confirmed
302	Chr2	8891615	8891618	3	scaffold49	617194	619517	2323	confirmed
303	Chr2	9195853	9195853	0	scaffold89	21442	21725	283	unconfirmed
304	Chr2	9256157	9256189	32	scaffold89	82432	82537	105	unconfirmed
305	Chr2	9521634	9521638	4	scaffold89	362812	363014	202	unconfirmed
306	Chr2	9736630	9736634	4	scaffold89	578202	578327	125	unconfirmed
307	Chr2	9765430	9765447	17	scaffold89	606236	606453	217	unconfirmed
308	Chr2	9771307	9771356	49	scaffold89	612333	614174	1841	confirmed
309	Chr2	9898007	9898011	4	scaffold89	740479	740651	172	unconfirmed
310	Chr2	9971521	9971529	8	scaffold138	63197	64902	1705	confirmed
311	Chr2	10241457	10241458	1	scaffold91	47719	48178	459	confirmed
312	Chr2	10248556	10248565	9	scaffold91	55255	55491	236	confirmed
313	Chr2	10272683	10272685	2	scaffold91	79608	80935	1327	confirmed
314	Chr2	10447653	10447654	1	scaffold91	258402	258638	236	confirmed
315	Chr2	10505320	10505443	123	scaffold91	314867	318580	3713	N/A
316	Chr2	10729797	10729805	8	scaffold45	192296	196874	4578	confirmed
317	Chr2	10751613	10751752	139	scaffold45	220179	223765	3586	confirmed
318	Chr2	11367609	11367614	5	scaffold45	828576	833382	4806	confirmed
319	Chr2	11498591	11498598	7	scaffold45	956526	956735	209	confirmed
320	Chr2	12157196	12157236	40	scaffold45	1613898	1614031	133	confirmed
321	Chr2	12204094	12204108	14	scaffold45	1663389	1663592	203	confirmed
322	Chr2	12305372	12305413	41	scaffold45	1765118	1765326	208	confirmed
323	Chr2	12378175	12378210	35	scaffold45	1838577	1838740	163	confirmed
324	Chr2	12404431	12404442	11	scaffold45	1864772	1865202	430	confirmed
325	Chr2	12404431	12404442	11	scaffold45	1865241	1865397	156	confirmed
326	Chr2	12446342	12446344	2	scaffold45	1907522	1907934	412	confirmed
327	Chr2	12458041	12458041	0	scaffold45	1914367	1917386	3019	confirmed
328	Chr2	12493648	12493653	5	scaffold45	1953144	1953465	321	confirmed
329	Chr2	12557616	12557628	12	scaffold45	2012549	2013466	917	confirmed
330	Chr2	12593550	12593581	31	scaffold45	2037028	2037224	196	confirmed
331	Chr2	12715274	12715289	15	scaffold45	2161091	2161200	109	unconfirmed
332	Chr2	12942831	12942850	19	scaffold45	2390220	2390492	272	confirmed
333	Chr2	13289109	13289148	39	scaffold116	211251	211468	217	confirmed
334	Chr2	13440073	13440096	23	scaffold116	356558	356699	141	confirmed
335	Chr2	13463085	13463087	2	scaffold116	378485	378702	217	confirmed
336	Chr2	13717178	13717184	6	scaffold50	208981	209103	122	unconfirmed
337	Chr2	13866521	13866523	2	scaffold50	357418	357796	378	confirmed
338	Chr2	13919105	13919193	88	scaffold50	408350	409599	1249	confirmed
339	Chr2	13927639	13927639	0	scaffold50	418184	420017	1833	confirmed
340	Chr2	13944586	13944591	5	scaffold50	437408	442446	5038	confirmed
341	Chr2	14108186	14108192	6	scaffold50	608459	608593	134	confirmed
342	Chr2	14116559	14116574	15	scaffold50	616940	617239	299	confirmed
343	Chr2	14190812	14190817	5	scaffold50	692380	697118	4738	confirmed
344	Chr2	15047318	15047328	10	scaffold30	632709	632811	102	confirmed
345	Chr2	15335432	15335456	24	scaffold30	923649	923913	264	confirmed
346	Chr2	16221319	16221349	30	scaffold11	796334	796546	212	confirmed
347	Chr2	16248357	16248365	8	scaffold11	823577	823847	270	confirmed
348	Chr2	16799683	16799688	5	scaffold11	1371496	1372372	876	confirmed
349	Chr2	16926167	16926176	9	scaffold11	1499818	1500338	520	confirmed
350	Chr2	17268889	17268923	34	scaffold3	299650	300303	653	confirmed
351	Chr2	17582455	17582476	21	scaffold3	605072	605347	275	confirmed
352	Chr2	17676960	17676962	2	scaffold3	699630	700495	865	confirmed
353	Chr2	17900957	17900965	8	scaffold3	925272	925498	226	confirmed
354	Chr2	18012864	18012913	49	scaffold3	1043739	1043947	208	confirmed
355	Chr2	18051898	18051900	2	scaffold3	1083124	1084156	1032	confirmed
356	Chr2	18114775	18114793	18	scaffold3	1148399	1149202	803	confirmed
357	Chr2	18439568	18439573	5	scaffold3	1475710	1476311	601	confirmed
358	Chr2	18664466	18664471	5	scaffold3	1698079	1698241	162	confirmed
359	Chr2	19283308	19283319	11	scaffold82	79930	80093	163	confirmed
360	Chr2	19317189	19317193	4	scaffold82	114179	114305	126	confirmed
361	Chr2	19493792	19493820	28	scaffold82	291493	291607	114	confirmed
362	Chr2	19507675	19507708	33	scaffold82	305536	305691	155	confirmed
363	Chr2	19624820	19624831	11	scaffold82	422424	422874	450	confirmed
364	Chr3	1000929	1000960	31	scaffold5	996969	997116	147	unconfirmed
365	Chr3	1006129	1006175	46	scaffold5	1002311	1002444	133	confirmed
366	Chr3	1171466	1171474	8	scaffold5	1167935	1168907	972	confirmed
367	Chr3	1648750	1648788	38	scaffold5	1656134	1656416	282	confirmed
368	Chr3	1750763	1750767	4	scaffold5	1759190	1759308	118	confirmed
369	Chr3	2020864	2020893	29	scaffold123	59858	60142	284	confirmed
370	Chr3	2038025	2038039	14	scaffold123	77318	78622	1304	confirmed
371	Chr3	2099364	2099375	11	scaffold123	140729	141619	890	confirmed
372	Chr3	2225112	2225128	16	scaffold123	267453	267681	228	unconfirmed
373	Chr3	2563520	2563521	1	scaffold5219	184758	184870	112	confirmed
374	Chr3	2676650	2676655	5	scaffold5219	297127	297786	659	confirmed
375	Chr3	2794222	2794223	1	scaffold5219	415199	415340	141	confirmed
376	Chr3	2886761	2886766	5	scaffold5219	497919	502365	4446	confirmed
377	Chr3	3052546	3052547	1	scaffold5219	667265	667573	308	confirmed
378	Chr3	3193537	3193581	44	scaffold4	80208	80316	108	confirmed
379	Chr3	3303913	3303922	9	scaffold4	190426	190702	276	confirmed
380	Chr3	3813946	3813970	24	scaffold4	692733	693155	422	confirmed
381	Chr3	4080580	4080588	8	scaffold4	956536	956640	104	unconfirmed
382	Chr3	4224915	4224949	34	scaffold4	1102955	1103173	218	confirmed
383	Chr3	4400628	4400645	17	scaffold4	1264712	1264852	140	confirmed
384	Chr3	4428758	4428767	9	scaffold4	1292995	1293237	242	confirmed
385	Chr3	4672861	4672910	49	scaffold85	128137	128289	152	confirmed
386	Chr3	4746618	4746758	140	scaffold85	198872	201153	2281	confirmed
387	Chr3	4800142	4800145	3	scaffold85	257991	258554	563	confirmed
388	Chr3	4922095	4922106	11	scaffold9	48232	48711	479	confirmed
389	Chr3	4939991	4940008	17	scaffold9	61891	67897	6006	confirmed
390	Chr3	5566728	5566753	25	scaffold9	685691	685875	184	confirmed
391	Chr3	5678456	5678460	4	scaffold9	794525	799352	4827	confirmed
392	Chr3	5870846	5870875	29	scaffold9	990153	990356	203	confirmed
393	Chr3	6087486	6087487	1	scaffold48	28701	28806	105	confirmed
394	Chr3	6215785	6215811	26	scaffold48	157350	157900	550	confirmed
395	Chr3	6261783	6261795	12	scaffold48	203807	203983	176	confirmed
396	Chr3	6311376	6311394	18	scaffold48	253304	253576	272	confirmed
397	Chr3	6391101	6391104	3	scaffold48	333182	334409	1227	confirmed
398	Chr3	6469230	6469234	4	scaffold48	411052	411223	171	confirmed
399	Chr3	6597013	6597013	0	scaffold48	539002	539104	102	confirmed
400	Chr3	6599381	6599395	14	scaffold48	541479	541719	240	confirmed
401	Chr3	7325447	7325477	30	scaffold5297	34249	34438	189	N/A
402	Chr3	7599495	7599644	149	scaffold5297	308362	312137	3775	confirmed
403	Chr3	7766650	7766697	47	scaffold5297	480297	480459	162	confirmed
404	Chr3	7787106	7787111	5	scaffold5297	501071	505706	4635	confirmed
405	Chr3	7794344	7794367	23	scaffold5297	512979	513195	216	confirmed
406	Chr3	8140597	8140643	46	scaffold42	132154	132357	203	unconfirmed
407	Chr3	8188961	8188978	17	scaffold42	180660	180879	219	confirmed
408	Chr3	8295416	8295431	15	scaffold42	281991	282186	195	confirmed
409	Chr3	8301857	8301891	34	scaffold42	288573	288704	131	unconfirmed
410	Chr3	8382109	8382131	22	scaffold42	368441	368598	157	confirmed
411	Chr3	8403169	8403184	15	scaffold42	389854	389962	108	confirmed
412	Chr3	8410078	8410095	17	scaffold42	394950	395533	583	confirmed
413	Chr3	8901293	8901305	12	scaffold93	44271	44382	111	unconfirmed
414	Chr3	9483849	9483849	0	scaffold41	387448	389845	2397	confirmed
415	Chr3	9638396	9638414	18	scaffold41	549398	550064	666	confirmed
416	Chr3	9680667	9680676	9	scaffold41	592398	592503	105	unconfirmed
417	Chr3	9713017	9713026	9	scaffold41	624902	625035	133	unconfirmed
418	Chr3	9774405	9774444	39	scaffold41	673145	673249	104	unconfirmed
419	Chr3	10176191	10176200	9	scaffold148	62233	63344	1111	confirmed
420	Chr3	10295700	10295702	2	scaffold95	94187	94667	480	confirmed
421	Chr3	10359713	10359721	8	scaffold95	157322	157807	485	confirmed
422	Chr3	10411642	10411646	4	scaffold95	199829	200263	434	confirmed
423	Chr3	10464266	10464268	2	scaffold95	265993	266277	284	confirmed
424	Chr3	10465107	10465116	9	scaffold95	267118	268619	1501	unconfirmed
425	Chr3	10529924	10529929	5	scaffold219	27095	27327	232	unconfirmed
426	Chr3	10529924	10529929	5	scaffold219	27427	27544	117	unconfirmed
427	Chr3	10536876	10536877	1	scaffold219	34541	35565	1024	confirmed
428	Chr3	10541849	10541850	1	scaffold219	40534	41315	781	confirmed
429	Chr3	10549247	10549251	4	scaffold219	50462	56398	5936	confirmed
430	Chr3	10845746	10845746	0	scaffold166	67014	67331	317	confirmed
431	Chr3	10885282	10885286	4	scaffold166	106854	107985	1131	confirmed
432	Chr3	10897997	10897998	1	scaffold166	120718	121148	430	confirmed
433	Chr3	10903792	10903831	39	scaffold166	127768	127907	139	unconfirmed
434	Chr3	10949376	10949385	9	scaffold166	173774	174340	566	confirmed
435	Chr3	11031368	11031373	5	scaffold166	250626	251799	1173	confirmed
436	Chr3	11087582	11087583	1	scaffold166	304426	305531	1105	confirmed
437	Chr3	11110313	11110318	5	scaffold175	5497	10927	5430	confirmed
438	Chr3	11172273	11172278	5	scaffold175	76438	76782	344	unconfirmed
439	Chr3	11244172	11244176	4	scaffold210	4436	4568	132	confirmed
440	Chr3	11360639	11360647	8	scaffold894	599	1471	872	confirmed
441	Chr3	11463112	11463118	6	scaffold239	31386	32137	751	unconfirmed
442	Chr3	11508519	11508519	0	scaffold278	16641	17573	932	confirmed
443	Chr3	11529420	11529430	10	scaffold278	40062	40392	330	confirmed
444	Chr3	11816842	11816847	5	scaffold158	45264	46152	888	confirmed
445	Chr3	11835529	11835533	4	scaffold274	3034	3206	172	confirmed
446	Chr3	11910837	11910849	12	scaffold275	9708	9828	120	confirmed
447	Chr3	12019140	12019174	34	scaffold336	10660	11446	786	confirmed
448	Chr3	12043953	12043954	1	scaffold336	37855	39125	1270	confirmed
449	Chr3	12164813	12164820	7	scaffold380	7109	7253	144	confirmed
450	Chr3	12346553	12346563	10	scaffold218	29695	30740	1045	confirmed
451	Chr3	12361011	12361026	15	scaffold218	44501	44888	387	confirmed
452	Chr3	12507904	12507905	1	scaffold444	1982	3292	1310	confirmed
453	Chr3	12516525	12516572	47	scaffold444	9925	10179	254	confirmed
454	Chr3	12524998	12525106	108	scaffold552	934	4483	3549	confirmed
455	Chr3	12586426	12586427	1	scaffold284	33515	33964	449	confirmed
456	Chr3	12694373	12694404	31	scaffold248	17602	18312	710	unconfirmed
457	Chr3	13415889	13415891	2	scaffold487	546	893	347	confirmed
458	Chr3	13423046	13423048	2	scaffold487	8374	9957	1583	confirmed
459	Chr2	5893017	5893024	7	scaffold348	12701	12815	114	confirmed
460	Chr4	4151321	4151355	34	scaffold285	4845	8488	3643	confirmed
461	Chr3	13990787	13990790	3	scaffold520	1340	2894	1554	confirmed
462	Chr3	14250632	14250634	2	scaffold5242	23635	24380	745	confirmed
463	Chr3	14317988	14317989	1	scaffold370	15149	15486	337	confirmed
464	Chr3	14735627	14735627	0	scaffold229	52719	53619	900	confirmed
465	Chr3	14742420	14742427	7	scaffold229	60192	61208	1016	confirmed
466	Chr3	14749397	14749420	23	scaffold229	68600	68879	279	unconfirmed
467	Chr3	14929429	14929436	7	scaffold167	104240	104345	105	confirmed
468	Chr3	14963009	14963020	11	scaffold167	138099	138312	213	confirmed
469	Chr3	14987905	14987924	19	scaffold153	1139	1451	312	unconfirmed
470	Chr3	15005833	15005860	27	scaffold153	16552	18391	1839	confirmed
471	Chr3	15014859	15014861	2	scaffold153	27449	32475	5026	confirmed
472	Chr3	15064938	15064938	0	scaffold153	77487	77867	380	unconfirmed
473	Chr3	15347817	15347821	4	scaffold143	16947	20352	3405	confirmed
474	Chr3	15358744	15358748	4	scaffold143	32037	32232	195	unconfirmed
475	Chr3	15692262	15692276	14	scaffold173	40165	40602	437	confirmed
476	Chr3	16183515	16183528	13	scaffold306	20867	21045	178	unconfirmed
477	Chr3	16322402	16322418	16	scaffold73	48678	50285	1607	confirmed
478	Chr3	16350092	16350092	0	scaffold73	63700	63821	121	unconfirmed
479	Chr3	16350953	16350954	1	scaffold73	64683	64874	191	unconfirmed
480	Chr3	16422506	16422512	6	scaffold73	139551	152524	12973	confirmed
481	Chr3	16483638	16484039	401	scaffold73	220113	225960	5847	confirmed
482	Chr3	16508070	16508071	1	scaffold73	250669	250978	309	unconfirmed
483	Chr3	16687862	16687868	6	scaffold73	423168	427231	4063	confirmed
484	Chr3	16720765	16720769	4	scaffold73	460668	460917	249	unconfirmed
485	Chr3	16729840	16729848	8	scaffold73	468253	469544	1291	confirmed
486	Chr3	16768966	16768976	10	scaffold73	510661	510880	219	unconfirmed
487	Chr3	16769460	16769466	6	scaffold73	511388	512375	987	confirmed
488	Chr3	16776128	16776169	41	scaffold73	519404	519619	215	unconfirmed
489	Chr3	16884157	16884168	11	scaffold156	30636	30874	238	confirmed
490	Chr3	16952205	16952218	13	scaffold156	103384	107084	3700	confirmed
491	Chr2	10107219	10107223	4	scaffold58	85141	88511	3370	confirmed
492	Chr2	10083187	10083201	14	scaffold58	104915	105470	555	confirmed
493	Chr2	10051714	10051719	5	scaffold58	136456	141639	5183	confirmed
494	Chr3	17176588	17176727	139	scaffold146	25316	27147	1831	confirmed
495	Chr3	17223389	17223547	158	scaffold146	69555	73650	4095	confirmed
496	Chr3	17475995	17476007	12	scaffold69	48486	49500	1014	confirmed
497	Chr3	17617165	17617193	28	scaffold69	196615	196944	329	confirmed
498	Chr3	17637628	17637629	1	scaffold69	218171	218591	420	confirmed
499	Chr3	17681955	17681956	1	scaffold69	263026	263456	430	confirmed
500	Chr3	18221182	18221189	7	scaffold63	41382	50207	8825	confirmed
501	Chr3	18560266	18560293	27	scaffold63	385830	389937	4107	confirmed
502	Chr3	18744916	18744921	5	scaffold63	578505	578685	180	unconfirmed
503	Chr3	18790165	18790166	1	scaffold63	625072	625215	143	unconfirmed
504	Chr3	19135940	19135947	7	scaffold5207	92555	92683	128	confirmed
505	Chr3	19333755	19333781	26	scaffold67	113041	113295	254	confirmed
506	Chr3	19443339	19443369	30	scaffold168	18372	18712	340	confirmed
507	Chr3	19488663	19488707	44	scaffold55	6688	8121	1433	confirmed
508	Chr3	19533871	19534248	377	scaffold55	51618	56948	5330	N/A
509	Chr3	19605628	19605658	30	scaffold55	127599	127923	324	confirmed
510	Chr3	19639426	19639533	107	scaffold55	161327	164466	3139	confirmed
511	Chr3	19647548	19647552	4	scaffold55	174812	175080	268	confirmed
512	Chr3	19983569	19983581	12	scaffold55	509539	509834	295	confirmed
513	Chr3	20357282	20357288	6	scaffold55	882869	884032	1163	confirmed
514	Chr3	20466225	20466235	10	scaffold954	1808	2188	380	confirmed
515	Chr3	20527076	20527113	37	scaffold15	51760	51956	196	confirmed
516	Chr3	20662473	20662482	9	scaffold15	187365	187646	281	confirmed
517	Chr3	20668427	20668428	1	scaffold15	193594	193821	227	confirmed
518	Chr3	20759420	20759432	12	scaffold15	284110	284359	249	confirmed
519	Chr3	20849202	20849203	1	scaffold15	372017	372662	645	confirmed
520	Chr3	20878234	20878290	56	scaffold15	400133	400763	630	confirmed
521	Chr3	20951790	20951794	4	scaffold15	473753	474289	536	confirmed
522	Chr3	20956935	20956964	29	scaffold15	479474	480799	1325	confirmed
523	Chr3	21063695	21063702	7	scaffold15	586260	586736	476	confirmed
524	Chr3	21557096	21557116	20	scaffold22	419102	419402	300	confirmed
525	Chr3	21604416	21604421	5	scaffold22	467780	472345	4565	confirmed
526	Chr3	21798639	21798650	11	scaffold22	670728	671216	488	confirmed
527	Chr3	21802566	21802590	24	scaffold22	675153	675527	374	confirmed
528	Chr3	22023887	22023934	47	scaffold22	898108	898329	221	N/A
529	Chr3	22091674	22091677	3	scaffold22	961904	962147	243	confirmed
530	Chr3	22160473	22160499	26	scaffold112	20816	21081	265	confirmed
531	Chr3	22470048	22470049	1	scaffold61	230741	230930	189	confirmed
532	Chr3	22951311	22951319	8	scaffold7	325301	325604	303	confirmed
533	Chr3	23359599	23359611	12	scaffold57	262389	263040	651	confirmed
534	Chr4	324626	324633	7	scaffold5226	322986	323614	628	confirmed
535	Chr4	691243	691248	5	scaffold192	26330	26512	182	confirmed
536	Chr4	712932	713022	90	scaffold192	44815	45915	1100	confirmed
537	Chr4	858607	858629	22	scaffold100	76251	76400	149	confirmed
538	Chr4	910745	910776	31	scaffold100	124107	124247	140	confirmed
539	Chr4	958862	958876	14	scaffold100	173374	174301	927	confirmed
540	Chr4	1342392	1342396	4	scaffold100	543186	543451	265	confirmed
541	Chr4	1342927	1342941	14	scaffold100	544000	544173	173	confirmed
542	Chr4	1470529	1470535	6	scaffold99	107747	109581	1834	confirmed
543	Chr4	1472548	1472567	19	scaffold99	111583	111729	146	confirmed
544	Chr4	1476010	1476011	1	scaffold99	115185	117037	1852	confirmed
545	Chr4	1533309	1533322	13	scaffold99	180202	180393	191	unconfirmed
546	Chr4	1585761	1585834	73	scaffold99	231425	233495	2070	confirmed
547	Chr4	1586762	1586762	0	scaffold99	234508	235097	589	confirmed
548	Chr4	1590129	1590142	13	scaffold99	239229	240777	1548	confirmed
549	Chr4	1595820	1595868	48	scaffold99	247601	247755	154	confirmed
550	Chr4	1975682	1975685	3	scaffold233	8783	10279	1496	confirmed
551	Chr4	2215650	2215658	8	scaffold154	128865	129250	385	N/A
552	Chr4	2231161	2231163	2	scaffold154	153495	153631	136	unconfirmed
553	Chr4	2275270	2275271	1	scaffold111	6195	6593	398	confirmed
554	Chr4	2336369	2336374	5	scaffold111	65395	65808	413	confirmed
555	Chr4	2338014	2338021	7	scaffold111	67466	69916	2450	confirmed
556	Chr4	2344012	2344054	42	scaffold111	76555	76770	215	confirmed
557	Chr4	2365050	2365050	0	scaffold111	92741	93021	280	confirmed
558	Chr4	2588539	2588567	28	scaffold131	148919	149102	183	confirmed
559	Chr4	2608360	2608361	1	scaffold131	167806	168304	498	confirmed
560	Chr4	2849671	2849676	5	scaffold333	9662	9882	220	unconfirmed
561	Chr4	2853392	2853394	2	scaffold333	14129	16454	2325	confirmed
562	Chr4	2915867	2915878	11	scaffold1171	1320	1817	497	N/A
563	Chr3	13826415	13826419	4	scaffold605	10933	11244	311	confirmed
564	Chr4	2981592	2981601	9	scaffold526	626	846	220	confirmed
565	Chr4	3445657	3445697	40	scaffold399	2644	3342	698	unconfirmed
566	Chr4	3648133	3648145	12	scaffold423	10964	11709	745	confirmed
567	Chr4	4056749	4056750	1	scaffold365	10312	10640	328	unconfirmed
568	Chr4	4083867	4083919	52	scaffold365	41608	43050	1442	confirmed
569	Chr4	4089420	4089518	98	scaffold365	46756	48039	1283	confirmed
570	Chr4	4257137	4257185	48	scaffold337	13809	14032	223	unconfirmed
571	Chr2	6581818	6581847	29	scaffold642	2301	3754	1453	confirmed
572	Chr1	16099418	16099420	2	scaffold1654	423	611	188	confirmed
573	Chr4	5247136	5247183	47	scaffold142	66566	66696	130	unconfirmed
574	Chr4	5394297	5394298	1	scaffold771	651	934	283	confirmed
575	Chr4	5437266	5437268	2	scaffold262	63331	64431	1100	confirmed
576	Chr4	5549017	5549066	49	scaffold259	62590	62698	108	unconfirmed
577	Chr4	5572091	5572275	184	scaffold620	550	2397	1847	N/A
578	Chr4	5614615	5614631	16	scaffold245	45445	50032	4587	confirmed
579	Chr4	5621781	5621783	2	scaffold245	56544	56836	292	unconfirmed
580	Chr4	5747698	5747699	1	scaffold217	25694	25796	102	unconfirmed
581	Chr4	5753182	5753183	1	scaffold217	31301	37005	5704	confirmed
582	Chr4	5981597	5981672	75	scaffold162	56825	59697	2872	confirmed
583	Chr4	6009583	6009587	4	scaffold162	75750	75928	178	N/A
584	Chr4	6009587	6009587	0	scaffold162	76036	76238	202	unconfirmed
585	Chr4	6042750	6042787	37	scaffold162	110682	110848	166	confirmed
586	Chr4	6074477	6074488	11	scaffold162	136558	136940	382	confirmed
587	Chr4	6090787	6090793	6	scaffold162	154079	158860	4781	confirmed
588	Chr4	6353304	6353308	4	scaffold119	23893	29209	5316	confirmed
589	Chr4	6459138	6459155	17	scaffold287	16682	16892	210	confirmed
590	Chr4	6507944	6508105	161	scaffold474	6757	12145	5388	confirmed
591	Chr4	6512282	6512285	3	scaffold213	36850	36995	145	unconfirmed
592	Chr4	6586328	6586338	10	scaffold213	104796	105328	532	confirmed
593	Chr4	6594842	6594871	29	scaffold213	108383	108679	296	confirmed
594	Chr4	6601827	6601829	2	scaffold213	114082	114717	635	unconfirmed
595	Chr4	6748536	6748548	12	scaffold5240	75746	76295	549	confirmed
596	Chr4	6754302	6754306	4	scaffold5240	84424	85235	811	confirmed
597	Chr4	6797544	6797570	26	scaffold5240	127855	127957	102	N/A
598	Chr4	6814334	6814350	16	scaffold5240	143145	143516	371	confirmed
599	Chr4	6859747	6859747	0	scaffold283	12377	12678	301	confirmed
600	Chr4	7012930	7012934	4	scaffold105	148207	148378	171	unconfirmed
601	Chr4	7197274	7197281	7	scaffold160	75955	76349	394	unconfirmed
602	Chr4	7233639	7233683	44	scaffold149	25921	26034	113	unconfirmed
603	Chr4	7275523	7275527	4	scaffold149	66276	66611	335	N/A
604	Chr4	7279795	7279798	3	scaffold149	68854	69087	233	confirmed
605	Chr4	7643916	7643920	4	scaffold113	112488	112746	258	confirmed
606	Chr4	7709724	7709879	155	scaffold675	14523	16801	2278	unconfirmed
607	Chr4	7802186	7802205	19	scaffold5208	92904	93016	112	unconfirmed
608	Chr4	7945651	7945692	41	scaffold76	41327	41541	214	unconfirmed
609	Chr4	7952918	7952923	5	scaffold76	49090	49216	126	unconfirmed
610	Chr4	7956971	7957122	151	scaffold76	57064	59381	2317	unconfirmed
611	Chr4	8094323	8094326	3	scaffold76	205167	205663	496	confirmed
612	Chr4	8211611	8211634	23	scaffold76	323087	323210	123	confirmed
613	Chr4	8347710	8347717	7	scaffold76	460122	460444	322	confirmed
614	Chr4	8510586	8510592	6	scaffold76	627967	628200	233	unconfirmed
615	Chr4	8595920	8595932	12	scaffold74	31153	31768	615	confirmed
616	Chr4	8890448	8890451	3	scaffold74	327679	327800	121	unconfirmed
617	Chr4	9556059	9556072	13	scaffold81	317111	317612	501	confirmed
618	Chr4	10101155	10101156	1	scaffold81	839124	839261	137	unconfirmed
619	Chr4	10155345	10155347	2	scaffold81	895285	895424	139	unconfirmed
620	Chr4	10176216	10176219	3	scaffold81	912495	912610	115	unconfirmed
621	Chr4	10183456	10183461	5	scaffold81	919590	919757	167	unconfirmed
622	Chr4	10210789	10210791	2	scaffold81	946935	947178	243	confirmed
623	Chr4	10450395	10450397	2	scaffold103	236745	250277	13532	confirmed
624	Chr4	10609381	10609412	31	scaffold5315	25084	25257	173	confirmed
625	Chr4	10723048	10723055	7	scaffold5315	132246	132775	529	confirmed
626	Chr4	10733551	10733570	19	scaffold5315	143119	147056	3937	confirmed
627	Chr4	10804628	10804866	238	scaffold5315	217118	223841	6723	confirmed
628	Chr4	11146792	11146801	9	scaffold178	33280	33434	154	confirmed
629	Chr3	15196181	15196189	8	scaffold178	113529	113850	321	confirmed
630	Chr4	11479993	11480015	22	scaffold39	106774	106899	125	unconfirmed
631	Chr4	11638548	11638552	4	scaffold39	267649	267850	201	unconfirmed
632	Chr4	11643393	11643861	468	scaffold39	272706	279700	6994	N/A
633	Chr4	11649987	11650009	22	scaffold39	289803	289915	112	unconfirmed
634	Chr4	11843299	11843300	1	scaffold39	486328	486460	132	unconfirmed
635	Chr4	12340001	12340005	4	scaffold78	82034	82323	289	confirmed
636	Chr4	12430747	12430757	10	scaffold78	173246	173390	144	confirmed
637	Chr4	12485400	12485423	23	scaffold78	228355	228544	189	confirmed
638	Chr4	12947127	12947134	7	scaffold87	115365	115629	264	confirmed
639	Chr4	13113216	13113229	13	scaffold60	74881	78892	4011	confirmed
640	Chr4	13690594	13690618	24	scaffold6	85525	85637	112	confirmed
641	Chr4	14976755	14976779	24	scaffold23	133282	133425	143	confirmed
642	Chr4	15201280	15201314	34	scaffold23	354537	354770	233	confirmed
643	Chr4	15440768	15440788	20	scaffold23	589769	589879	110	confirmed
644	Chr4	15877625	15877634	9	scaffold23	1028059	1032413	4354	confirmed
645	Chr4	16050239	16050248	9	scaffold23	1204824	1205248	424	confirmed
646	Chr4	16051032	16051051	19	scaffold23	1206053	1206177	124	confirmed
647	Chr4	16508591	16508631	40	scaffold47	217945	218246	301	confirmed
648	Chr4	16574205	16574214	9	scaffold47	283966	284335	369	confirmed
649	Chr4	16584793	16584795	2	scaffold47	294909	295983	1074	confirmed
650	Chr4	16692814	16692858	44	scaffold47	404151	404384	233	confirmed
651	Chr4	16952019	16952021	2	scaffold47	663273	663605	332	confirmed
652	Chr4	17117452	17117467	15	scaffold40	36400	36643	243	confirmed
653	Chr4	17217936	17217980	44	scaffold40	136960	137429	469	confirmed
654	Chr4	17262913	17262921	8	scaffold40	182351	183068	717	confirmed
655	Chr4	17398573	17398591	18	scaffold40	319378	319620	242	confirmed
656	Chr4	17459235	17459256	21	scaffold40	380637	380923	286	confirmed
657	Chr4	17522945	17522951	6	scaffold40	443942	444080	138	confirmed
658	Chr4	17588969	17588999	30	scaffold40	511261	511728	467	confirmed
659	Chr4	17689950	17689953	3	scaffold40	610697	610979	282	confirmed
660	Chr4	17699063	17699103	40	scaffold40	620185	620333	148	confirmed
661	Chr4	17773240	17773245	5	scaffold40	691458	691766	308	confirmed
662	Chr4	17821338	17821473	135	scaffold40	739853	741986	2133	confirmed
663	Chr4	17850560	17850606	46	scaffold40	771376	771543	167	confirmed
664	Chr4	18085511	18085539	28	scaffold40	1006777	1007106	329	confirmed
665	Chr4	18334368	18334372	4	scaffold62	88671	88958	287	confirmed
666	Chr4	18505640	18505647	7	scaffold62	261110	261274	164	confirmed
667	Chr4	18517134	18517136	2	scaffold62	272690	272815	125	confirmed
668	Chr4	18522747	18522762	15	scaffold62	278417	278547	130	confirmed
669	Chr5	993	996	3	scaffold35	1270	1426	156	confirmed
670	Chr5	841452	841455	3	scaffold21	484071	484803	732	confirmed
671	Chr5	909386	909416	30	scaffold21	551464	551611	147	confirmed
672	Chr5	984657	984665	8	scaffold21	626609	628040	1431	confirmed
673	Chr5	1017535	1017566	31	scaffold21	667941	668046	105	confirmed
674	Chr5	1030764	1030768	4	scaffold2	5005	9881	4876	confirmed
675	Chr5	1094490	1094500	10	scaffold2	71103	71425	322	confirmed
676	Chr5	1250083	1250085	2	scaffold2	226448	228088	1640	confirmed
677	Chr5	2081984	2082004	20	scaffold2	1049951	1050139	188	confirmed
678	Chr5	2421992	2421994	2	scaffold2	1382337	1382454	117	confirmed
679	Chr5	2592237	2592238	1	scaffold2	1552477	1552925	448	confirmed
680	Chr5	2892941	2892984	43	scaffold2	1855291	1855482	191	confirmed
681	Chr5	3142761	3142783	22	scaffold5237	195207	195424	217	confirmed
682	Chr5	3160446	3160486	40	scaffold5237	213163	213377	214	confirmed
683	Chr5	4822211	4822242	31	scaffold5237	1856344	1856494	150	confirmed
684	Chr5	4962016	4962037	21	scaffold5237	1999635	1999841	206	confirmed
685	Chr5	4989925	4989926	1	scaffold5237	2027755	2028252	497	confirmed
686	Chr5	5191539	5191569	30	scaffold5230	77047	77158	111	confirmed
687	Chr5	5201402	5201417	15	scaffold5230	87045	87396	351	confirmed
688	Chr5	5205498	5205498	0	scaffold5230	91580	92210	630	confirmed
689	Chr5	5254074	5254095	21	scaffold5230	136877	137098	221	confirmed
690	Chr5	5335747	5335768	21	scaffold5230	218381	218534	153	confirmed
691	Chr5	5347282	5347735	453	scaffold5230	230497	239179	8682	confirmed
692	Chr5	5593008	5593062	54	scaffold5230	483916	485029	1113	unconfirmed
693	Chr5	6195634	6195683	49	scaffold5230	1077046	1077398	352	confirmed
694	Chr5	6224553	6224592	39	scaffold5230	1099535	1099689	154	confirmed
695	Chr5	6296769	6296776	7	scaffold5230	1171994	1172549	555	confirmed
696	Chr5	6402431	6402433	2	scaffold5230	1274376	1275100	724	confirmed
697	Chr5	6439024	6439031	7	scaffold5230	1307035	1307260	225	confirmed
698	Chr5	6570032	6570034	2	scaffold5230	1438009	1438184	175	confirmed
699	Chr5	7256640	7256640	0	scaffold5230	2102561	2102853	292	confirmed
700	Chr5	7299465	7299468	3	scaffold5230	2145587	2146207	620	confirmed
701	Chr5	7381203	7381207	4	scaffold5230	2238613	2238885	272	confirmed
702	Chr5	7479994	7480035	41	scaffold5230	2337563	2337700	137	confirmed
703	Chr5	7541170	7541175	5	scaffold5230	2398686	2399648	962	confirmed
704	Chr5	7608537	7608542	5	scaffold5230	2467201	2467319	118	confirmed
705	Chr5	7645451	7645612	161	scaffold5230	2504404	2512674	8270	confirmed
706	Chr5	7648690	7648692	2	scaffold5230	2515979	2516676	697	confirmed
707	Chr5	7803291	7803300	9	scaffold5230	2672673	2673030	357	confirmed
708	Chr5	7870207	7870237	30	scaffold5230	2743092	2743217	125	confirmed
709	Chr5	7969186	7969191	5	scaffold5230	2843172	2843286	114	unconfirmed
710	Chr5	8124091	8124113	22	scaffold186	27307	27607	300	confirmed
711	Chr5	8246071	8246270	199	scaffold171	23463	32658	9195	confirmed
712	Chr5	8416165	8416174	9	scaffold66	116914	118090	1176	confirmed
713	Chr5	8439066	8439066	0	scaffold66	138077	138661	584	confirmed
714	Chr5	8543154	8543157	3	scaffold66	244706	244973	267	confirmed
715	Chr5	8636452	8636458	6	scaffold36	23487	23683	196	confirmed
716	Chr5	8834943	8834947	4	scaffold36	223540	224355	815	confirmed
717	Chr5	9042931	9042933	2	scaffold36	424413	425078	665	confirmed
718	Chr5	9127745	9127771	26	scaffold155	22659	22920	261	confirmed
719	Chr5	9135139	9135178	39	scaffold155	29687	29925	238	confirmed
720	Chr5	9178273	9178320	47	scaffold155	74048	74153	105	unconfirmed
721	Chr5	9181097	9181109	12	scaffold155	76815	78238	1423	confirmed
722	Chr5	9191941	9191944	3	scaffold155	81298	81403	105	unconfirmed
723	Chr5	9225061	9225068	7	scaffold5204	1739	2209	470	confirmed
724	Chr5	9442924	9442934	10	scaffold5204	214366	214500	134	confirmed
725	Chr5	9637860	9637882	22	scaffold5217	52726	52828	102	confirmed
726	Chr5	9858345	9858351	6	scaffold130	147590	147761	171	unconfirmed
727	Chr5	9889772	9889781	9	scaffold130	179328	179796	468	confirmed
728	Chr5	9901725	9901725	0	scaffold130	184736	186093	1357	confirmed
729	Chr5	9978203	9978316	113	scaffold130	247193	249834	2641	confirmed
730	Chr5	10029583	10029827	244	scaffold130	316031	325413	9382	confirmed
731	Chr5	10034721	10034727	6	scaffold130	330537	330829	292	confirmed
732	Chr5	10039990	10040005	15	scaffold130	336634	336749	115	unconfirmed
733	Chr2	5899396	5899398	2	scaffold310	67467	67974	507	N/A
734	Chr5	10409733	10409795	62	scaffold187	74616	75814	1198	confirmed
735	Chr4	1794708	1794719	11	scaffold263	45628	49299	3671	confirmed
736	Chr5	10498840	10498842	2	scaffold241	35495	43597	8102	confirmed
737	Chr5	10567787	10567790	3	scaffold140	43823	44371	548	confirmed
738	Chr5	10596851	10596853	2	scaffold434	6045	6429	384	confirmed
739	Chr5	10643848	10643898	50	scaffold135	34465	38824	4359	confirmed
740	Chr5	10655878	10655880	2	scaffold135	50854	51336	482	confirmed
741	Chr5	10789110	10789113	3	scaffold377	16679	16888	209	confirmed
742	Chr5	11271814	11271816	2	scaffold289	9765	11507	1742	confirmed
743	Chr5	12619760	12620107	347	scaffold260	4047	8433	4386	confirmed
744	Chr5	13467420	13467425	5	scaffold195	5591	6582	991	confirmed
745	Chr5	13573327	13573386	59	scaffold157	29552	30366	814	confirmed
746	Chr5	13575526	13575559	33	scaffold157	32509	32862	353	confirmed
747	Chr5	13617253	13617269	16	scaffold157	70018	70366	348	confirmed
748	Chr5	13626132	13626137	5	scaffold157	77979	78431	452	confirmed
749	Chr5	13704648	13704650	2	scaffold157	154300	154838	538	confirmed
750	Chr5	13769318	13769325	7	scaffold165	30981	31179	198	unconfirmed
751	Chr5	13833492	13833830	338	scaffold165	94753	102231	7478	confirmed
752	Chr5	13862318	13862318	0	scaffold250	10393	10744	351	confirmed
753	Chr5	13863725	13863726	1	scaffold250	12176	12514	338	confirmed
754	Chr5	14690406	14690406	0	scaffold161	142179	142778	599	confirmed
755	Chr5	14744076	14744078	2	scaffold161	195495	196059	564	confirmed
756	Chr5	14804504	14804514	10	scaffold161	255933	262569	6636	confirmed
757	Chr5	14810368	14810383	15	scaffold161	268580	269410	830	confirmed
758	Chr5	14988575	14988773	198	scaffold161	447505	453499	5994	confirmed
759	Chr5	15040754	15040775	21	scaffold161	505125	505260	135	unconfirmed
760	Chr3	10462632	10462674	42	scaffold293	40831	41491	660	confirmed
761	Chr5	15136398	15136403	5	scaffold630	1729	1840	111	confirmed
762	Chr5	15169373	15169383	10	scaffold255	7590	8453	863	confirmed
763	Chr5	15189377	15189442	65	scaffold255	22729	23397	668	confirmed
764	Chr5	15540632	15540634	2	scaffold125	319085	319259	174	confirmed
765	Chr5	15695955	15695981	26	scaffold125	453759	453880	121	unconfirmed
766	Chr5	15700238	15700448	210	scaffold125	457697	460099	2402	confirmed
767	Chr5	15771005	15771009	4	scaffold125	523817	523931	114	confirmed
768	Chr5	15792588	15792595	7	scaffold125	544656	544936	280	confirmed
769	Chr5	15801482	15801501	19	scaffold125	554562	556305	1743	confirmed
770	Chr5	15847972	15847973	1	scaffold122	35483	36030	547	confirmed
771	Chr5	15861810	15861814	4	scaffold122	48524	48791	267	confirmed
772	Chr5	15892015	15892018	3	scaffold122	81356	81567	211	confirmed
773	Chr4	11098591	11098592	1	scaffold345	8146	8967	821	confirmed
774	Chr5	15914723	15914747	24	scaffold345	21295	21490	195	confirmed
775	Chr5	16048081	16048083	2	scaffold5243	124874	125207	333	confirmed
776	Chr5	16088099	16088143	44	scaffold5205	33727	38442	4715	confirmed
777	Chr5	16178877	16178885	8	scaffold5205	133411	133991	580	confirmed
778	Chr5	16481814	16481819	5	scaffold5205	433748	433859	111	unconfirmed
779	Chr5	16508813	16508818	5	scaffold5205	459481	459613	132	unconfirmed
780	Chr5	16621105	16621122	17	scaffold97	110577	110806	229	confirmed
781	Chr5	16623185	16623253	68	scaffold97	112865	114141	1276	confirmed
782	Chr5	17654078	17654080	2	scaffold75	156137	157138	1001	confirmed
783	Chr5	17722202	17722208	6	scaffold75	227699	228097	398	confirmed
784	Chr5	17811145	17811147	2	scaffold75	315567	315995	428	confirmed
785	Chr5	17820179	17820191	12	scaffold75	323089	323337	248	confirmed
786	Chr5	17958908	17958913	5	scaffold56	99984	100568	584	confirmed
787	Chr5	18081133	18081134	1	scaffold56	226822	226986	164	confirmed
788	Chr5	18220129	18220133	4	scaffold56	337706	338195	489	confirmed
789	Chr5	18225436	18225452	16	scaffold56	343731	344316	585	confirmed
790	Chr5	18656813	18656825	12	scaffold18	76870	77217	347	confirmed
791	Chr5	18704784	18704855	71	scaffold18	127634	129574	1940	confirmed
792	Chr5	18745527	18745574	47	scaffold18	173412	173541	129	confirmed
793	Chr5	18755031	18755041	10	scaffold18	182998	183266	268	confirmed
794	Chr5	19726190	19726195	5	scaffold18	1137896	1138184	288	confirmed
795	Chr5	19991692	19991934	242	scaffold18	1393163	1396965	3802	unconfirmed
796	Chr5	20002094	20002112	18	scaffold18	1408107	1408381	274	confirmed
797	Chr5	20323829	20323900	71	scaffold5235	205247	206171	924	confirmed
798	Chr5	20532914	20532929	15	scaffold5235	412884	413051	167	confirmed
799	Chr5	22150394	22150434	40	scaffold28	982471	982862	391	confirmed
800	Chr5	22777621	22777650	29	scaffold5227	153023	153212	189	confirmed
801	Chr5	22794465	22794475	10	scaffold5227	170185	170487	302	confirmed
802	Chr5	22962841	22962846	5	scaffold5227	341180	341306	126	confirmed
803	Chr5	22978237	22978238	1	scaffold5227	356691	356963	272	confirmed
804	Chr5	23151656	23151677	21	scaffold5227	532008	532111	103	confirmed
805	Chr5	23741899	23741916	17	scaffold5228	202243	203375	1132	confirmed
806	Chr5	24000509	24000541	32	scaffold5228	460145	460300	155	confirmed
807	Chr5	24323254	24323262	8	scaffold5228	769891	770597	706	confirmed
808	Chr5	25179743	25179772	29	scaffold5228	1635488	1635715	227	confirmed
809	Chr5	25279718	25279720	2	scaffold5228	1735442	1735708	266	confirmed
810	Chr5	25430103	25430110	7	scaffold5228	1886338	1886450	112	confirmed
811	Chr5	25478437	25478457	20	scaffold5228	1934908	1935080	172	confirmed
812	Chr5	25645008	25645023	15	scaffold5228	2103395	2103548	153	confirmed
813	Chr5	25738841	25738849	8	scaffold5228	2197298	2198367	1069	confirmed
814	Chr5	25793638	25793640	2	scaffold5228	2253341	2253454	113	confirmed
815	Chr5	24018559	24018608	49	scaffold452	628	731	103	confirmed
816	Chr5	24023832	24023836	4	scaffold452	5880	6216	336	confirmed
817	Chr5	26119987	26119988	1	scaffold5221	45823	46394	571	confirmed
818	Chr5	26325117	26325117	0	scaffold5221	252029	252183	154	confirmed
819	Chr5	26335562	26335599	37	scaffold5221	262679	262897	218	confirmed
820	Chr5	26398863	26398867	4	scaffold5221	326563	326678	115	confirmed
821	Chr5	26475249	26475266	17	scaffold5221	403264	403418	154	confirmed
822	Chr5	26503567	26503571	4	scaffold5221	429696	429889	193	confirmed
823	Chr5	26563454	26563455	1	scaffold5221	491529	491714	185	N/A
824	Chr4	13574010	13574040	30	scaffold578	712	819	107	confirmed
825	Chr5	26695422	26695431	9	scaffold59	89027	89782	755	confirmed
826	Chr5	26740485	26740487	2	scaffold59	134799	135421	622	confirmed
827	Chr1	372412	372663	251	scaffold53	374648	374651	3	unconfirmed
828	Chr1	923835	925665	1830	scaffold5422	144419	144422	3	confirmed
829	Chr1	1881929	1882320	391	scaffold5415	593301	593304	3	unconfirmed
830	Chr1	2335025	2335529	504	scaffold5415	1049023	1049028	5	unconfirmed
831	Chr1	2445218	2445353	135	scaffold5269	29762	29766	4	unconfirmed
832	Chr1	2657434	2657602	168	scaffold5295	184552	184561	9	unconfirmed
833	Chr1	2657738	2657920	182	scaffold5295	184552	184561	9	unconfirmed
834	Chr1	2789783	2789908	125	scaffold142	87158	87189	31	confirmed
835	Chr1	2793358	2793488	130	scaffold142	83739	83759	20	confirmed
836	Chr1	2826339	2826667	328	scaffold5295	344383	344385	2	unconfirmed
837	Chr1	3062677	3063143	466	scaffold5295	580235	580237	2	confirmed
838	Chr1	3090075	3090303	228	scaffold5295	606379	606382	3	unconfirmed
839	Chr1	3196234	3196418	184	scaffold5295	712808	712813	5	unconfirmed
840	Chr1	3198265	3198403	138	scaffold5295	714696	714697	1	unconfirmed
841	Chr1	3263858	3264983	1125	scaffold5295	779973	779990	17	confirmed
842	Chr1	3328909	3333497	4588	scaffold203	39614	39628	14	confirmed
843	Chr1	3728976	3730398	1422	scaffold64	315264	315284	20	confirmed
844	Chr1	3935857	3936315	458	scaffold64	515456	515458	2	unconfirmed
845	Chr1	4209164	4209311	147	scaffold5255	114092	114097	5	unconfirmed
846	Chr1	4259795	4262409	2614	scaffold5255	164033	164221	188	confirmed
847	Chr1	4329896	4334391	4495	scaffold5255	232319	232328	9	confirmed
848	Chr1	5369880	5374696	4816	scaffold5255	1277019	1277361	342	unconfirmed
849	Chr1	5394353	5394586	233	scaffold5255	1295796	1295797	1	unconfirmed
850	Chr1	5633784	5633947	163	scaffold5255	1536301	1536315	14	unconfirmed
851	Chr1	5656263	5656390	127	scaffold5255	1558718	1558723	5	unconfirmed
852	Chr1	5873284	5873530	246	scaffold5255	1771926	1771928	2	unconfirmed
853	Chr1	6173291	6173565	274	scaffold5255	2067209	2067221	12	unconfirmed
854	Chr1	7071597	7074682	3085	scaffold5342	78146	78152	6	confirmed
855	Chr1	7360157	7360271	114	scaffold142	83761	83764	3	confirmed
856	Chr1	7923856	7923966	110	scaffold5202	570314	570354	40	unconfirmed
857	Chr1	7963346	7963576	230	scaffold5202	607835	607878	43	unconfirmed
858	Chr1	8024001	8024247	246	scaffold5209	12686	12691	5	unconfirmed
859	Chr1	8583237	8583675	438	scaffold5231	70631	70639	8	unconfirmed
860	Chr1	8589800	8590691	891	scaffold5231	76676	76679	3	confirmed
861	Chr1	8676343	8676980	637	scaffold5231	165380	165382	2	confirmed
862	Chr1	8729236	8733575	4339	scaffold5231	217569	217596	27	confirmed
863	Chr1	8927603	8933223	5620	scaffold5465	73992	74007	15	confirmed
864	Chr1	9017048	9018490	1442	scaffold5465	146539	146579	40	confirmed
865	Chr1	9077629	9077771	142	scaffold5465	205953	205966	13	unconfirmed
866	Chr1	9147535	9148458	923	scaffold5352	62510	62516	6	confirmed
867	Chr1	9368349	9373307	4958	scaffold5352	284494	284805	311	confirmed
868	Chr1	9758839	9758977	138	scaffold5352	651295	651338	43	unconfirmed
869	Chr1	9806939	9807173	234	scaffold5352	702730	702738	8	unconfirmed
870	Chr1	10004695	10004853	158	scaffold5421	114675	114695	20	confirmed
871	Chr1	10021662	10021958	296	scaffold164	12749	12751	2	unconfirmed
872	Chr1	10333308	10333747	439	scaffold54	242699	242702	3	confirmed
873	Chr1	10606313	10606563	250	scaffold5382	105633	105643	10	unconfirmed
874	Chr1	10647996	10648317	321	scaffold5382	147040	147061	21	unconfirmed
875	Chr1	10840005	10840941	936	scaffold5382	343173	343180	7	confirmed
876	Chr1	11028248	11028925	677	scaffold5384	99255	99264	9	confirmed
877	Chr1	11208136	11208237	101	scaffold5309	150573	150582	9	unconfirmed
878	Chr1	11225232	11225374	142	scaffold5309	167592	167595	3	unconfirmed
879	Chr1	11284316	11284525	209	scaffold5309	225883	225885	2	unconfirmed
880	Chr1	11297629	11299138	1509	scaffold5468	12407	12436	29	confirmed
881	Chr1	11315686	11316715	1029	scaffold5468	18779	18866	87	confirmed
882	Chr1	11323102	11323341	239	scaffold5468	24786	24809	23	unconfirmed
883	Chr1	11336515	11336630	115	scaffold5468	39021	39063	42	unconfirmed
884	Chr1	11407235	11407381	146	scaffold5468	115575	115606	31	unconfirmed
885	Chr1	11428179	11428422	243	scaffold5468	134592	134632	40	confirmed
886	Chr1	11494487	11495311	824	scaffold5468	198771	198798	27	confirmed
887	Chr1	11782513	11783044	531	scaffold5458	126516	126525	9	unconfirmed
888	Chr1	11803571	11803690	119	scaffold5458	142381	142389	8	unconfirmed
889	Chr1	11805831	11806448	617	scaffold5458	143767	143767	0	confirmed
890	Chr1	11807828	11807936	108	scaffold5458	144665	144680	15	unconfirmed
891	Chr1	12192704	12192897	193	scaffold84	207224	207232	8	unconfirmed
892	Chr1	12228476	12228669	193	scaffold84	242020	242029	9	unconfirmed
893	Chr1	12273257	12276642	3385	scaffold200	24229	24244	15	confirmed
894	Chr1	12325148	12325362	214	scaffold200	74594	74603	9	unconfirmed
895	Chr1	12337276	12337704	428	scaffold5352	454279	454287	8	confirmed
896	Chr1	12483150	12483573	423	scaffold5487	137865	137882	17	unconfirmed
897	Chr1	12496928	12497812	884	scaffold5487	151098	151101	3	confirmed
898	Chr1	12500755	12500968	213	scaffold5487	153710	153759	49	unconfirmed
899	Chr1	13417659	13421489	3830	scaffold5477	47529	47538	9	confirmed
900	Chr1	13429659	13430233	574	scaffold5477	52795	52831	36	confirmed
901	Chr1	13430330	13430525	195	scaffold5477	52795	52831	36	confirmed
902	Chr1	13435578	13435680	102	scaffold5477	57863	57884	21	unconfirmed
903	Chr1	13470950	13471543	593	scaffold5477	100600	100615	15	confirmed
904	Chr1	13562395	13563644	1249	scaffold234	49685	49692	7	confirmed
905	Chr1	13590870	13591169	299	scaffold234	76771	76776	5	unconfirmed
906	Chr1	13616732	13616947	215	scaffold5290	1600	1616	16	unconfirmed
907	Chr1	13624181	13624356	175	scaffold5290	8017	8022	5	confirmed
908	Chr1	14002753	14003191	438	scaffold240	59454	59455	1	unconfirmed
909	Chr1	14164236	14164446	210	scaffold258	56587	56595	8	unconfirmed
910	Chr1	14176973	14177839	866	scaffold258	73267	73268	1	confirmed
911	Chr1	14698675	14698784	109	scaffold305	2976	3025	49	confirmed
912	Chr1	14706203	14706365	162	scaffold305	3712	3718	6	confirmed
913	Chr1	15036145	15036248	103	scaffold495	3680	3711	31	confirmed
914	Chr1	15871377	15871656	279	scaffold5314	712	719	7	unconfirmed
915	Chr1	15873010	15873846	836	scaffold5314	2062	2063	1	confirmed
916	Chr1	15886649	15886781	132	scaffold5274	1987	1995	8	confirmed
917	Chr1	15901578	15903350	1772	scaffold5274	16849	16855	6	confirmed
918	Chr1	15959494	15960054	560	scaffold5276	7212	7226	14	unconfirmed
919	Chr1	15972512	15972846	334	scaffold5276	19769	19774	5	unconfirmed
920	Chr1	15986296	15986513	217	scaffold5276	33203	33205	2	unconfirmed
921	Chr1	16037372	16037512	140	scaffold340	16796	16803	7	unconfirmed
922	Chr1	16242089	16242322	233	scaffold1239	1150	1151	1	unconfirmed
923	Chr1	16273081	16274766	1685	scaffold228	11063	11094	31	confirmed
924	Chr1	16311071	16316788	5717	scaffold228	34334	34344	10	confirmed
925	Chr1	16329673	16330217	544	scaffold228	46931	46933	2	unconfirmed
926	Chr1	16334798	16335330	532	scaffold228	51524	51525	1	unconfirmed
927	Chr1	16602536	16602662	126	scaffold516	8085	8085	0	unconfirmed
928	Chr1	16779522	16779648	126	scaffold179	63427	63463	36	unconfirmed
929	Chr1	16787632	16787989	357	scaffold179	71445	71451	6	unconfirmed
930	Chr1	17040316	17040892	576	scaffold351	38605	38658	53	N/A
931	Chr1	17121420	17121659	239	scaffold5456	14988	14993	5	unconfirmed
932	Chr1	17133999	17134511	512	scaffold5456	27296	27307	11	unconfirmed
933	Chr1	17168117	17168793	676	scaffold5456	59696	59701	5	confirmed
934	Chr1	17187142	17187305	163	scaffold5456	77785	77805	20	unconfirmed
935	Chr1	17371237	17372122	885	scaffold5342	25092	25094	2	confirmed
936	Chr1	17379085	17379254	169	scaffold5342	32026	32028	2	unconfirmed
937	Chr1	17448683	17449167	484	scaffold5342	111225	111239	14	unconfirmed
938	Chr1	17573799	17574190	391	scaffold5330	20553	20571	18	unconfirmed
939	Chr1	17591101	17591426	325	scaffold5330	36020	36060	40	unconfirmed
940	Chr1	17598924	17601290	2366	scaffold5330	40723	40724	1	confirmed
941	Chr1	17620927	17621658	731	scaffold5330	64230	64236	6	confirmed
942	Chr1	17666941	17668368	1427	scaffold5330	105335	105385	50	confirmed
943	Chr1	17686081	17686273	192	scaffold5330	112923	112923	0	unconfirmed
944	Chr1	17760189	17761328	1139	scaffold5330	187320	187417	97	confirmed
945	Chr1	17842314	17845286	2972	scaffold5330	269769	269778	9	confirmed
946	Chr1	17938927	17939160	233	scaffold109	8220	8230	10	unconfirmed
947	Chr1	18058280	18059368	1088	scaffold109	120126	120136	10	confirmed
948	Chr1	18300613	18300742	129	scaffold5354	125038	125041	3	confirmed
949	Chr1	18414684	18415425	741	scaffold5354	237909	237929	20	confirmed
950	Chr1	18692243	18693237	994	scaffold5303	64558	64565	7	confirmed
951	Chr1	18955613	18956627	1014	scaffold94	127188	127196	8	confirmed
952	Chr1	19272019	19273504	1485	scaffold94	442138	442172	34	confirmed
953	Chr1	19319916	19320737	821	scaffold94	489043	489046	3	confirmed
954	Chr1	19354335	19356265	1930	scaffold94	513590	513624	34	confirmed
955	Chr1	19599516	19600610	1094	scaffold94	756433	756437	4	confirmed
956	Chr1	19720475	19720618	143	scaffold5440	2575	2579	4	unconfirmed
957	Chr1	19795797	19795961	164	scaffold5440	64706	64755	49	N/A
958	Chr1	20085566	20090249	4683	scaffold5440	358944	358950	6	confirmed
959	Chr1	20509211	20509385	174	scaffold5440	760639	760639	0	confirmed
960	Chr1	21069908	21070866	958	scaffold5333	215925	215954	29	confirmed
961	Chr1	21108792	21111387	2595	scaffold172	10494	10528	34	unconfirmed
962	Chr1	21168959	21169117	158	scaffold172	81147	81152	5	unconfirmed
963	Chr1	21174155	21174938	783	scaffold172	86194	86196	2	confirmed
964	Chr1	21236512	21236635	123	scaffold238	19290	19299	9	unconfirmed
965	Chr1	21462804	21463009	205	scaffold5262	134223	134267	44	unconfirmed
966	Chr1	21509604	21509748	144	scaffold5262	180063	180066	3	unconfirmed
967	Chr1	21509782	21510092	310	scaffold5262	180063	180066	3	unconfirmed
968	Chr1	21701086	21706307	5221	scaffold5305	11525	11727	202	confirmed
969	Chr1	21717801	21718043	242	scaffold5305	23988	23990	2	unconfirmed
970	Chr1	21741783	21744474	2691	scaffold5305	47109	47303	194	confirmed
971	Chr1	21936113	21936291	178	scaffold5216	69924	69962	38	unconfirmed
972	Chr1	21991252	21992973	1721	scaffold5216	126828	126837	9	confirmed
973	Chr1	22069247	22069817	570	scaffold5216	203167	203180	13	confirmed
974	Chr1	22089148	22089274	126	scaffold72	3780	3787	7	confirmed
975	Chr1	22089427	22089864	437	scaffold72	3780	3787	7	confirmed
976	Chr1	22362915	22363242	327	scaffold72	265956	265956	0	unconfirmed
977	Chr1	22842240	22842393	153	scaffold72	751681	751687	6	unconfirmed
978	Chr1	22888264	22889117	853	scaffold72	795277	795298	21	confirmed
979	Chr1	23414955	23415295	340	scaffold127	237560	237560	0	unconfirmed
980	Chr1	23495646	23495996	350	scaffold163	3695	3698	3	unconfirmed
981	Chr1	23651614	23651728	114	scaffold16	73501	73507	6	unconfirmed
982	Chr1	23651868	23652015	147	scaffold16	73501	73507	6	unconfirmed
983	Chr1	23679098	23679273	175	scaffold16	100555	100587	32	unconfirmed
984	Chr1	23686159	23686344	185	scaffold16	108042	108049	7	unconfirmed
985	Chr1	23726445	23727638	1193	scaffold16	158100	158189	89	confirmed
986	Chr1	24004929	24005170	241	scaffold16	439346	439349	3	unconfirmed
987	Chr1	24082231	24082918	687	scaffold16	517531	517563	32	confirmed
988	Chr1	24524526	24524669	143	scaffold16	961492	961494	2	unconfirmed
989	Chr1	24878954	24879194	240	scaffold341	2947	2966	19	unconfirmed
990	Chr1	25010868	25013071	2203	scaffold13	112830	112831	1	confirmed
991	Chr1	25219714	25219815	101	scaffold13	318379	318410	31	unconfirmed
992	Chr1	25343361	25343530	169	scaffold13	444005	444021	16	confirmed
993	Chr1	25962565	25962831	266	scaffold13	1066764	1066764	0	confirmed
994	Chr1	25975953	25976992	1039	scaffold13	1079455	1079455	0	confirmed
995	Chr1	26053758	26053875	117	scaffold13	1161809	1161822	13	unconfirmed
996	Chr1	26366810	26371464	4654	scaffold13	1489397	1489401	4	confirmed
997	Chr1	26887430	26888352	922	scaffold13	2000154	2000179	25	confirmed
998	Chr1	26891715	26891842	127	scaffold13	2003609	2003626	17	unconfirmed
999	Chr1	26904035	26909281	5246	scaffold13	2015324	2015568	244	confirmed
1000	Chr1	27117504	27118014	510	scaffold13	2226807	2226817	10	confirmed
1001	Chr1	27430801	27430903	102	scaffold13	2540876	2540916	40	unconfirmed
1002	Chr1	28035811	28036098	287	scaffold29	602941	602941	0	unconfirmed
1003	Chr1	28470276	28470512	236	scaffold29	1037522	1037531	9	confirmed
1004	Chr1	28738492	28738658	166	scaffold33	215080	215084	4	unconfirmed
1005	Chr1	28856391	28856755	364	scaffold33	332596	332609	13	unconfirmed
1006	Chr1	28920619	28921012	393	scaffold33	396010	396013	3	unconfirmed
1007	Chr1	28953639	28960448	6809	scaffold33	429330	429336	6	confirmed
1008	Chr1	28997450	28997778	328	scaffold33	466312	466313	1	unconfirmed
1009	Chr1	29774533	29774640	107	scaffold33	1246591	1246591	0	confirmed
1010	Chr1	29774758	29774883	125	scaffold33	1246591	1246591	0	confirmed
1011	Chr1	29900277	29900448	171	scaffold5222	59451	59486	35	unconfirmed
1012	Chr1	29979357	29979653	296	scaffold5222	138364	138393	29	unconfirmed
1013	Chr2	337739	338126	387	scaffold92	37998	38006	8	unconfirmed
1014	Chr2	340651	340794	143	scaffold92	40494	40504	10	unconfirmed
1015	Chr2	649589	649761	172	scaffold92	346919	346920	1	unconfirmed
1016	Chr2	651062	651216	154	scaffold92	348182	348200	18	unconfirmed
1017	Chr2	1080056	1081700	1644	scaffold188	54861	54873	12	confirmed
1018	Chr2	1288788	1289236	448	scaffold5215	46345	46390	45	confirmed
1019	Chr2	1318429	1318687	258	scaffold185	1479	1480	1	unconfirmed
1020	Chr2	1347475	1347833	358	scaffold185	29797	29797	0	confirmed
1021	Chr2	1468334	1468664	330	scaffold185	136782	136809	27	unconfirmed
1022	Chr2	1535276	1536313	1037	scaffold185	204758	204801	43	confirmed
1023	Chr2	1537981	1538300	319	scaffold185	206474	206482	8	unconfirmed
1024	Chr2	1543013	1543324	311	scaffold185	211290	211290	0	unconfirmed
1025	Chr2	1716802	1717171	369	scaffold104	172114	172117	3	unconfirmed
1026	Chr2	1876746	1878788	2042	scaffold298	21014	21041	27	confirmed
1027	Chr2	1922700	1922831	131	scaffold190	16781	16787	6	unconfirmed
1028	Chr2	1979184	1979517	333	scaffold196	32247	32281	34	unconfirmed
1029	Chr2	2063493	2063741	248	scaffold686	9312	9320	8	unconfirmed
1030	Chr2	2073946	2075009	1063	scaffold137	23712	23784	72	confirmed
1031	Chr2	2137521	2137641	120	scaffold137	67668	67671	3	unconfirmed
1032	Chr2	2167383	2167490	107	scaffold137	97132	97136	4	unconfirmed
1033	Chr2	2176533	2176791	258	scaffold137	108322	108323	1	unconfirmed
1034	Chr2	2293928	2294753	825	scaffold254	9525	9532	7	confirmed
1035	Chr2	2302224	2302660	436	scaffold254	17450	17451	1	confirmed
1036	Chr2	2468430	2468795	365	scaffold742	3151	3176	25	unconfirmed
1037	Chr2	2580101	2582219	2118	scaffold207	18250	18254	4	confirmed
1038	Chr2	2803950	2804711	761	scaffold296	10984	10986	2	confirmed
1039	Chr2	2858588	2858976	388	scaffold170	15913	15917	4	confirmed
1040	Chr2	2987180	2987557	377	scaffold198	76363	76364	1	unconfirmed
1041	Chr2	2989506	2990854	1348	scaffold198	78305	78305	0	confirmed
1042	Chr2	2994776	2994973	197	scaffold198	82227	82246	19	unconfirmed
1043	Chr2	3027598	3027892	294	scaffold331	1379	1384	5	unconfirmed
1044	Chr2	3050651	3050841	190	scaffold331	31610	31611	1	unconfirmed
1045	Chr2	3057895	3058272	377	scaffold331	38402	38411	9	confirmed
1046	Chr2	3120411	3121169	758	scaffold382	8525	8597	72	confirmed
1047	Chr2	3156455	3156692	237	scaffold382	21441	21442	1	unconfirmed
1048	Chr2	3157150	3158192	1042	scaffold382	21890	21967	77	confirmed
1049	Chr2	3536769	3536872	103	scaffold246	38098	38100	2	confirmed
1050	Chr2	3544777	3546099	1322	scaffold246	47484	47485	1	confirmed
1051	Chr2	3595287	3595714	427	scaffold657	18467	18475	8	confirmed
1052	Chr2	3711133	3711286	153	scaffold615	1023	1025	2	unconfirmed
1053	Chr2	3932401	3933189	788	scaffold231	50912	50913	1	confirmed
1054	Chr2	4115535	4116056	521	scaffold307	30215	30219	4	confirmed
1055	Chr2	4282235	4282436	201	scaffold189	24726	24729	3	confirmed
1056	Chr2	4469080	4469583	503	scaffold199	50148	50154	6	confirmed
1057	Chr2	4471825	4472042	217	scaffold199	53108	53118	10	confirmed
1058	Chr2	4645099	4645380	281	scaffold5210	30186	30194	8	unconfirmed
1059	Chr2	4670467	4670581	114	scaffold433	6903	6908	5	unconfirmed
1060	Chr2	5181651	5181779	128	scaffold230	28175	28185	10	unconfirmed
1061	Chr2	5378800	5378931	131	scaffold226	3466	3471	5	confirmed
1062	Chr2	5420718	5420871	153	scaffold226	46927	46929	2	unconfirmed
1063	Chr2	5582770	5582883	113	scaffold265	35173	35176	3	unconfirmed
1064	Chr2	5583767	5584476	709	scaffold265	35978	35979	1	confirmed
1065	Chr2	5631841	5635402	3561	scaffold90	5871	5873	2	confirmed
1066	Chr2	5878868	5879172	304	scaffold376	71921	71926	5	confirmed
1067	Chr2	5879221	5879615	394	scaffold376	71921	71954	33	confirmed
1068	Chr2	5882512	5882761	249	scaffold294	102016	102038	22	unconfirmed
1069	Chr2	5907525	5907771	246	scaffold294	112750	112778	28	unconfirmed
1070	Chr2	6552000	6552606	606	scaffold147	211093	211126	33	confirmed
1071	Chr2	6554661	6555176	515	scaffold147	213159	213162	3	confirmed
1072	Chr2	6671095	6677289	6194	scaffold147	285576	285583	7	confirmed
1073	Chr2	6778858	6785567	6709	scaffold201	22737	22752	15	confirmed
1074	Chr2	6881205	6887935	6730	scaffold5214	77989	78644	655	confirmed
1075	Chr2	7056748	7057072	324	scaffold5236	115047	115049	2	confirmed
1076	Chr2	7162582	7163054	472	scaffold77	115327	115340	13	confirmed
1077	Chr2	7661888	7662039	151	scaffold77	609752	609768	16	unconfirmed
1078	Chr2	7762162	7762727	565	scaffold77	709599	709601	2	confirmed
1079	Chr2	7777060	7784299	7239	scaffold77	724693	724713	20	confirmed
1080	Chr2	7803477	7803709	232	scaffold77	743808	743816	8	unconfirmed
1081	Chr2	7853562	7853665	103	scaffold77	793415	793418	3	unconfirmed
1082	Chr2	8014392	8014616	224	scaffold77	955708	955711	3	confirmed
1083	Chr2	8014789	8015060	271	scaffold77	955708	955711	3	confirmed
1084	Chr2	8344132	8349006	4874	scaffold49	86993	87341	348	confirmed
1085	Chr2	8621744	8622892	1148	scaffold49	355359	355366	7	confirmed
1086	Chr2	8869425	8869793	368	scaffold49	596763	596783	20	confirmed
1087	Chr2	8869842	8870278	436	scaffold49	596763	596783	20	confirmed
1088	Chr2	8884600	8884913	313	scaffold49	611456	611464	8	confirmed
1089	Chr2	8917240	8917341	101	scaffold49	641243	641249	6	confirmed
1090	Chr2	8918659	8918778	119	scaffold49	642555	642557	2	unconfirmed
1091	Chr2	9121959	9125818	3859	scaffold608	4493	4498	5	confirmed
1092	Chr2	9419638	9420045	407	scaffold89	262181	262184	3	confirmed
1093	Chr2	9687810	9688084	274	scaffold89	530166	530179	13	unconfirmed
1094	Chr2	9740122	9740430	308	scaffold89	581825	581848	23	unconfirmed
1095	Chr2	9843840	9844052	212	scaffold89	686506	686533	27	unconfirmed
1096	Chr2	9860074	9860234	160	scaffold89	702549	702562	13	confirmed
1097	Chr2	9897162	9897266	104	scaffold89	739908	739915	7	confirmed
1098	Chr2	9927693	9932556	4863	scaffold138	18733	19165	432	confirmed
1099	Chr2	10158185	10158700	515	scaffold58	32708	32754	46	confirmed
1100	Chr2	10343825	10344128	303	scaffold91	151660	151680	20	unconfirmed
1101	Chr2	10462871	10463354	483	scaffold91	277087	277089	2	confirmed
1102	Chr2	10494093	10494948	855	scaffold91	304530	304549	19	confirmed
1103	Chr2	10506836	10507356	520	scaffold91	319962	319972	10	confirmed
1104	Chr2	10535280	10536080	800	scaffold294	59971	59972	1	confirmed
1105	Chr2	10590236	10591232	996	scaffold45	69534	69558	24	confirmed
1106	Chr2	10873000	10873620	620	scaffold45	340018	340036	18	confirmed
1107	Chr2	11867190	11868313	1123	scaffold45	1325808	1325862	54	confirmed
1108	Chr2	12149582	12150031	449	scaffold45	1606689	1606695	6	confirmed
1109	Chr2	12910065	12910195	130	scaffold45	2357553	2357569	16	unconfirmed
1110	Chr2	13223063	13227047	3984	scaffold116	149445	149458	13	confirmed
1111	Chr2	13239448	13239755	307	scaffold116	161875	161878	3	unconfirmed
1112	Chr2	13453047	13454644	1597	scaffold116	369684	369684	0	confirmed
1113	Chr2	14117326	14117577	251	scaffold50	617986	618016	30	unconfirmed
1114	Chr2	14956298	14957064	766	scaffold30	542585	542591	6	confirmed
1115	Chr2	15595121	15597183	2062	scaffold11	171900	171909	9	confirmed
1116	Chr2	15896599	15896799	200	scaffold11	472901	472917	16	unconfirmed
1117	Chr2	15994743	15994862	119	scaffold11	571196	571198	2	unconfirmed
1118	Chr2	16041008	16041128	120	scaffold11	618034	618043	9	unconfirmed
1119	Chr2	16125665	16126520	855	scaffold11	702575	702596	21	confirmed
1120	Chr2	16373130	16373407	277	scaffold11	948263	948266	3	unconfirmed
1121	Chr2	16417657	16418084	427	scaffold11	991096	991111	15	confirmed
1122	Chr2	16709030	16710735	1705	scaffold11	1282199	1282208	9	confirmed
1123	Chr2	17580890	17581086	196	scaffold3	603677	603679	2	unconfirmed
1124	Chr2	17904888	17905047	159	scaffold3	928899	928912	13	confirmed
1125	Chr2	17924335	17924582	247	scaffold3	947883	947887	4	unconfirmed
1126	Chr2	18651266	18655832	4566	scaffold3	1689182	1689198	16	confirmed
1127	Chr2	19595389	19595540	151	scaffold82	393156	393160	4	unconfirmed
1128	Chr3	129168	130539	1371	scaffold5	129711	129724	13	confirmed
1129	Chr3	156626	158564	1938	scaffold5	155465	155593	128	confirmed
1130	Chr3	538810	538913	103	scaffold5	535866	535903	37	unconfirmed
1131	Chr3	982118	982341	223	scaffold5	980312	980315	3	unconfirmed
1132	Chr3	1143157	1143563	406	scaffold5	1140371	1140387	16	unconfirmed
1133	Chr3	1800825	1801041	216	scaffold5	1809392	1809392	0	unconfirmed
1134	Chr3	3263925	3264115	190	scaffold4	150601	150605	4	unconfirmed
1135	Chr3	3538174	3539113	939	scaffold4	424457	424467	10	confirmed
1136	Chr3	3652091	3652312	221	scaffold4	537581	537585	4	unconfirmed
1137	Chr3	3655185	3655414	229	scaffold4	540449	540462	13	unconfirmed
1138	Chr3	3716569	3717080	511	scaffold4	601399	601416	17	confirmed
1139	Chr3	3807306	3812643	5337	scaffold4	691407	691411	4	confirmed
1140	Chr3	4126513	4126648	135	scaffold4	1004102	1004107	5	unconfirmed
1141	Chr3	4494782	4494897	115	scaffold4	1359235	1359236	1	unconfirmed
1142	Chr3	4497618	4497787	169	scaffold4	1361771	1361786	15	unconfirmed
1143	Chr3	4724604	4725681	1077	scaffold85	180184	180194	10	confirmed
1144	Chr3	4873158	4873291	133	scaffold85	332292	332295	3	confirmed
1145	Chr3	5377196	5378216	1020	scaffold9	498400	498404	4	confirmed
1146	Chr3	5379753	5380249	496	scaffold9	499486	499533	47	confirmed
1147	Chr3	5493798	5494340	542	scaffold9	613264	613302	38	confirmed
1148	Chr3	5618700	5619128	428	scaffold9	738571	738575	4	confirmed
1149	Chr3	5835274	5836167	893	scaffold9	954867	954869	2	confirmed
1150	Chr3	5986184	5986676	492	scaffold9	1108944	1108945	1	confirmed
1151	Chr3	6431819	6433159	1340	scaffold48	375028	375029	1	confirmed
1152	Chr3	6566279	6566482	203	scaffold48	506940	506945	5	unconfirmed
1153	Chr3	6663810	6664044	234	scaffold48	606188	606195	7	unconfirmed
1154	Chr3	6684091	6684409	318	scaffold48	626487	626492	5	unconfirmed
1155	Chr3	7374494	7374595	101	scaffold5297	83348	83353	5	unconfirmed
1156	Chr3	7737069	7737643	574	scaffold5297	451295	451317	22	confirmed
1157	Chr3	8209452	8213306	3854	scaffold42	201422	201451	29	confirmed
1158	Chr3	9442214	9442389	175	scaffold41	355064	355067	3	confirmed
1159	Chr3	9450473	9450652	179	scaffold41	355064	355067	3	N/A
1160	Chr3	9466872	9467292	420	scaffold41	371257	371263	6	confirmed
1161	Chr3	9540713	9540960	247	scaffold41	447719	447719	0	confirmed
1162	Chr3	9725258	9725362	104	scaffold142	87158	87189	31	confirmed
1163	Chr3	9728815	9728927	112	scaffold142	83758	83759	1	confirmed
1164	Chr3	9739392	9740575	1183	scaffold41	639175	639183	8	confirmed
1165	Chr3	10267469	10267682	213	scaffold95	67002	67006	4	unconfirmed
1166	Chr3	10305141	10305428	287	scaffold95	104085	104113	28	unconfirmed
1167	Chr3	10483840	10484428	588	scaffold418	6964	6967	3	confirmed
1168	Chr3	10486552	10487799	1247	scaffold418	9080	9091	11	confirmed
1169	Chr3	10517679	10517941	262	scaffold219	15891	15896	5	unconfirmed
1170	Chr3	10545823	10547153	1330	scaffold219	47475	47561	86	confirmed
1171	Chr3	10577158	10581384	4226	scaffold219	64044	64048	4	confirmed
1172	Chr3	10583329	10583454	125	scaffold219	65187	65192	5	unconfirmed
1173	Chr3	10588322	10588793	471	scaffold219	69281	69291	10	confirmed
1174	Chr3	10600829	10601837	1008	scaffold219	81195	81197	2	confirmed
1175	Chr3	10615442	10616121	679	scaffold216	10912	10914	2	confirmed
1176	Chr3	10665574	10665686	112	scaffold216	59643	59685	42	unconfirmed
1177	Chr3	10921988	10922189	201	scaffold166	146384	146386	2	unconfirmed
1178	Chr3	10950618	10951804	1186	scaffold166	176114	176115	1	confirmed
1179	Chr3	10992347	10992831	484	scaffold166	216662	216665	3	confirmed
1180	Chr3	11040273	11040485	212	scaffold166	268829	268834	5	unconfirmed
1181	Chr3	11108781	11109176	395	scaffold175	4351	4353	2	unconfirmed
1182	Chr3	11174723	11175768	1045	scaffold175	79233	79234	1	confirmed
1183	Chr3	11242773	11242909	136	scaffold210	3174	3180	6	unconfirmed
1184	Chr3	11653989	11654118	129	scaffold309	34036	34038	2	unconfirmed
1185	Chr3	11780998	11782489	1491	scaffold158	2972	2973	1	confirmed
1186	Chr3	11874247	11874921	674	scaffold274	42136	42173	37	confirmed
1187	Chr3	11967968	11968121	153	scaffold159	61378	61378	0	confirmed
1188	Chr3	12144865	12145506	641	scaffold277	52452	52478	26	confirmed
1189	Chr3	12234333	12237540	3207	scaffold387	16133	16135	2	confirmed
1190	Chr3	12299121	12299657	536	scaffold441	7574	7576	2	confirmed
1191	Chr3	12338467	12338795	328	scaffold218	22938	22942	4	confirmed
1192	Chr3	12338943	12339083	140	scaffold218	22938	22942	4	confirmed
1193	Chr3	12356954	12357087	133	scaffold218	40973	40978	5	unconfirmed
1194	Chr3	12358980	12359522	542	scaffold218	43002	43005	3	confirmed
1195	Chr3	12365357	12368064	2707	scaffold218	49145	49150	5	confirmed
1196	Chr3	12378296	12378456	160	scaffold218	59212	59214	2	unconfirmed
1197	Chr3	12609385	12609575	190	scaffold284	50999	51004	5	unconfirmed
1198	Chr3	12977703	12977823	120	scaffold5444	119333	119342	9	confirmed
1199	Chr3	13176704	13176933	229	scaffold185	222777	222782	5	N/A
1200	Chr3	13308502	13308995	493	scaffold9	474748	474796	48	N/A
1201	Chr3	13325723	13325877	154	scaffold248	34373	34400	27	unconfirmed
1202	Chr3	13420280	13420481	201	scaffold487	5788	5794	6	unconfirmed
1203	Chr3	13921314	13921424	110	scaffold326	9503	9506	3	N/A
1204	Chr3	14686337	14687969	1632	scaffold229	2336	2338	2	confirmed
1205	Chr3	14737295	14737475	180	scaffold229	54806	54812	6	confirmed
1206	Chr3	14772192	14772348	156	scaffold5330	46106	46109	3	confirmed
1207	Chr3	14774891	14781566	6675	scaffold5330	43559	43565	6	confirmed
1208	Chr3	14796917	14797264	347	scaffold632	7696	7697	1	confirmed
1209	Chr3	14810924	14811678	754	scaffold167	2356	2364	8	confirmed
1210	Chr3	14838289	14841236	2947	scaffold167	27120	27286	166	confirmed
1211	Chr3	14869603	14869939	336	scaffold167	40958	40963	5	unconfirmed
1212	Chr3	14871469	14871967	498	scaffold167	42482	42488	6	confirmed
1213	Chr3	14924398	14925496	1098	scaffold167	100301	100302	1	confirmed
1214	Chr3	14994981	14996836	1855	scaffold153	8484	8488	4	confirmed
1215	Chr3	15052761	15054024	1263	scaffold153	68100	68110	10	confirmed
1216	Chr3	15078076	15080988	2912	scaffold153	90939	91090	151	N/A
1217	Chr3	15085808	15086164	356	scaffold153	95994	96041	47	unconfirmed
1218	Chr3	15174128	15177709	3581	scaffold417	578	835	257	unconfirmed
1219	Chr3	15225349	15225568	219	scaffold270	21646	21689	43	unconfirmed
1220	Chr3	15228939	15229317	378	scaffold270	25050	25081	31	unconfirmed
1221	Chr3	15232547	15232673	126	scaffold270	28323	28335	12	unconfirmed
1222	Chr3	15287693	15287904	211	scaffold346	16131	16134	3	unconfirmed
1223	Chr3	15373658	15374861	1203	scaffold143	58919	58969	50	confirmed
1224	Chr3	15396344	15396468	124	scaffold143	79835	79845	10	unconfirmed
1225	Chr3	15491889	15500727	8838	scaffold314	76333	76337	4	confirmed
1226	Chr3	15506681	15507257	576	scaffold62	2275	2283	8	confirmed
1227	Chr3	15525116	15530162	5046	scaffold342	1182	1385	203	confirmed
1228	Chr3	15609620	15610790	1170	scaffold286	22029	22039	10	confirmed
1229	Chr3	15648320	15648742	422	scaffold335	39941	39943	2	confirmed
1230	Chr3	15668073	15668178	105	scaffold173	17115	17121	6	unconfirmed
1231	Chr3	15677123	15677283	160	scaffold173	25692	25699	7	confirmed
1232	Chr3	16125379	16125729	350	scaffold279	2168	2209	41	unconfirmed
1233	Chr3	16152379	16152596	217	scaffold306	268	269	1	unconfirmed
1234	Chr3	16175122	16180553	5431	scaffold306	19354	19363	9	confirmed
1235	Chr3	16268247	16268391	144	scaffold948	1400	1410	10	unconfirmed
1236	Chr3	16286045	16286152	107	scaffold73	11424	11430	6	unconfirmed
1237	Chr3	16319863	16320018	155	scaffold73	45217	45221	4	unconfirmed
1238	Chr3	16352187	16353107	920	scaffold73	66101	66107	6	confirmed
1239	Chr3	16455553	16456091	538	scaffold73	189249	189260	11	confirmed
1240	Chr3	16539611	16539904	293	scaffold73	280341	280366	25	unconfirmed
1241	Chr3	16681923	16682958	1035	scaffold73	418147	418155	8	confirmed
1242	Chr3	16766009	16766471	462	scaffold73	505815	505817	2	confirmed
1243	Chr3	16766592	16766943	351	scaffold73	505815	505817	2	confirmed
1244	Chr3	16774484	16775062	578	scaffold73	517200	517200	0	confirmed
1245	Chr3	16787581	16787702	121	scaffold73	530597	530604	7	confirmed
1246	Chr3	16846944	16847893	949	scaffold73	586038	586046	8	confirmed
1247	Chr3	16854619	16854823	204	scaffold156	2122	2144	22	unconfirmed
1248	Chr3	16939956	16940083	127	scaffold156	91291	91316	25	unconfirmed
1249	Chr3	17064878	17066905	2027	scaffold58	210376	210530	154	unconfirmed
1250	Chr3	17088210	17088405	195	scaffold58	217832	217835	3	unconfirmed
1251	Chr3	17103287	17103388	101	scaffold58	232755	232763	8	unconfirmed
1252	Chr3	17177412	17177534	122	scaffold146	27751	27758	7	unconfirmed
1253	Chr3	17178447	17178595	148	scaffold146	28648	28650	2	unconfirmed
1254	Chr3	17236935	17237107	172	scaffold146	95241	95263	22	unconfirmed
1255	Chr3	17355804	17358093	2289	scaffold146	212208	212217	9	N/A
1256	Chr3	17842633	17843642	1009	scaffold19	94347	94352	5	confirmed
1257	Chr3	17914109	17914581	472	scaffold19	159541	159563	22	confirmed
1258	Chr3	17982344	17982615	271	scaffold19	228641	228646	5	confirmed
1259	Chr3	18016117	18016934	817	scaffold19	261815	261817	2	confirmed
1260	Chr3	18047429	18047711	282	scaffold19	290293	290307	14	confirmed
1261	Chr3	18047819	18048042	223	scaffold19	290293	290307	14	confirmed
1262	Chr3	18175285	18175509	224	scaffold5211	27489	27494	5	unconfirmed
1263	Chr3	18268689	18269640	951	scaffold63	97502	97550	48	confirmed
1264	Chr3	18873591	18873889	298	scaffold63	704991	704994	3	unconfirmed
1265	Chr3	19526594	19528156	1562	scaffold55	45190	45202	12	confirmed
1266	Chr3	19577857	19578426	569	scaffold55	100127	100131	4	confirmed
1267	Chr3	19648144	19648401	257	scaffold55	175663	175663	0	confirmed
1268	Chr3	19648519	19648620	101	scaffold55	175663	175706	43	confirmed
1269	Chr3	19692227	19692329	102	scaffold55	219478	219522	44	unconfirmed
1270	Chr3	19701001	19701197	196	scaffold55	228173	228184	11	unconfirmed
1271	Chr3	19802581	19803357	776	scaffold55	327020	327072	52	confirmed
1272	Chr3	20305696	20305885	189	scaffold55	831597	831598	1	confirmed
1273	Chr3	20629905	20630035	130	scaffold15	155670	155673	3	unconfirmed
1274	Chr3	22022890	22023033	143	scaffold22	897255	897259	4	unconfirmed
1275	Chr3	22066334	22066675	341	scaffold22	937086	937090	4	confirmed
1276	Chr3	22071953	22072090	137	scaffold22	942359	942360	1	unconfirmed
1277	Chr3	22542617	22547851	5234	scaffold373	15541	15550	9	confirmed
1278	Chr3	22954521	22954817	296	scaffold7	329184	329227	43	N/A
1279	Chr3	23124406	23127799	3393	scaffold57	26755	26760	5	confirmed
1280	Chr3	23377762	23377909	147	scaffold57	281289	281290	1	unconfirmed
1281	Chr4	528079	528215	136	scaffold5226	526492	526494	2	unconfirmed
1282	Chr4	800848	801095	247	scaffold100	32546	32556	10	unconfirmed
1283	Chr4	1013345	1013908	563	scaffold100	223841	223842	1	confirmed
1284	Chr4	1027858	1028444	586	scaffold100	233519	233523	4	confirmed
1285	Chr4	1487548	1487752	204	scaffold99	128973	128975	2	confirmed
1286	Chr4	1487793	1488133	340	scaffold99	128973	128975	2	confirmed
1287	Chr4	1497248	1497526	278	scaffold99	138062	138101	39	unconfirmed
1288	Chr4	1777550	1777755	205	scaffold263	23225	23235	10	confirmed
1289	Chr4	1837270	1837607	337	scaffold386	1737	1741	4	unconfirmed
1290	Chr4	1877817	1877954	137	scaffold273	3347	3349	2	unconfirmed
1291	Chr4	2008298	2008488	190	scaffold280	1393	1396	3	confirmed
1292	Chr4	2044618	2045005	387	scaffold280	38289	38289	0	confirmed
1293	Chr4	2051005	2051531	526	scaffold280	43838	43840	2	confirmed
1294	Chr4	2079491	2079635	144	scaffold154	5740	5743	3	unconfirmed
1295	Chr4	2089452	2089796	344	scaffold154	15357	15359	2	confirmed
1296	Chr4	2193672	2193924	252	scaffold154	120786	120787	1	unconfirmed
1297	Chr4	2197338	2198083	745	scaffold154	124066	124075	9	confirmed
1298	Chr4	2245332	2258819	13487	scaffold154	165250	166351	1101	unconfirmed
1299	Chr4	2308992	2309332	340	scaffold111	40176	40188	12	unconfirmed
1300	Chr4	2415218	2415379	161	scaffold111	162950	162952	2	unconfirmed
1301	Chr4	2506957	2507993	1036	scaffold131	65948	65948	0	confirmed
1302	Chr4	2655678	2655823	145	scaffold126	26274	26278	4	unconfirmed
1303	Chr4	2716319	2717275	956	scaffold227	2555	2557	2	confirmed
1304	Chr4	2885925	2886905	980	scaffold745	564	574	10	confirmed
1305	Chr4	2888415	2888760	345	scaffold745	2037	2040	3	confirmed
1306	Chr4	3065928	3066351	423	scaffold439	6469	6472	3	confirmed
1307	Chr4	3141536	3143897	2361	scaffold479	3292	3294	2	confirmed
1308	Chr4	3515431	3515575	144	scaffold493	21410	21411	1	unconfirmed
1309	Chr4	3704368	3704491	123	scaffold253	634	643	9	unconfirmed
1310	Chr4	3715597	3715735	138	scaffold253	11739	11740	1	unconfirmed
1311	Chr4	3924340	3925148	808	scaffold381	17987	17988	1	confirmed
1312	Chr4	3944181	3944446	265	scaffold381	36130	36131	1	unconfirmed
1313	Chr4	4255811	4255983	172	scaffold337	12679	12718	39	confirmed
1314	Chr4	4313939	4314475	536	scaffold561	1643	1667	24	confirmed
1315	Chr4	4591779	4591994	215	scaffold104	201524	201533	9	unconfirmed
1316	Chr4	4644198	4644748	550	scaffold304	1507	1517	10	confirmed
1317	Chr4	4685737	4686091	354	scaffold304	3714	3731	17	unconfirmed
1318	Chr4	4701944	4702209	265	scaffold304	21141	21190	49	unconfirmed
1319	Chr4	4703345	4703558	213	scaffold304	22313	22319	6	unconfirmed
1320	Chr4	4801246	4801614	368	scaffold407	11046	11055	9	unconfirmed
1321	Chr4	4904243	4904412	169	scaffold1711	338	353	15	confirmed
1322	Chr4	5618126	5619125	999	scaffold245	53883	53892	9	confirmed
1323	Chr4	5626248	5627226	978	scaffold245	63525	63527	2	confirmed
1324	Chr4	5641424	5641598	174	scaffold245	77069	77070	1	unconfirmed
1325	Chr4	5644458	5644883	425	scaffold245	80279	80297	18	confirmed
1326	Chr4	5763726	5765289	1563	scaffold217	47360	47363	3	confirmed
1327	Chr4	5773887	5774419	532	scaffold197	4889	4892	3	confirmed
1328	Chr4	5804269	5810403	6134	scaffold197	45796	45807	11	confirmed
1329	Chr4	5935124	5935336	212	scaffold162	19949	19957	8	unconfirmed
1330	Chr4	6127937	6128212	275	scaffold162	193185	193190	5	unconfirmed
1331	Chr4	6203669	6204308	639	scaffold214	65401	65406	5	confirmed
1332	Chr4	6300775	6301301	526	scaffold214	162905	162906	1	confirmed
1333	Chr4	6301329	6301530	201	scaffold214	162905	162906	1	confirmed
1334	Chr4	6443686	6444641	955	scaffold287	4999	5003	4	confirmed
1335	Chr4	6505910	6506258	348	scaffold474	3285	3293	8	confirmed
1336	Chr4	6552647	6553607	960	scaffold213	73582	73587	5	confirmed
1337	Chr4	6560409	6561630	1221	scaffold213	80252	80263	11	confirmed
1338	Chr4	6582978	6583088	110	scaffold213	101523	101526	3	unconfirmed
1339	Chr4	6588727	6593808	5081	scaffold213	107350	107355	5	confirmed
1340	Chr4	6626524	6627489	965	scaffold213	138925	138930	5	confirmed
1341	Chr4	6630396	6630561	165	scaffold213	141869	141904	35	unconfirmed
1342	Chr4	6718910	6719019	109	scaffold5240	50399	50441	42	unconfirmed
1343	Chr4	6723269	6728868	5599	scaffold5240	54429	54888	459	confirmed
1344	Chr4	6802080	6803302	1222	scaffold5240	133699	133780	81	confirmed
1345	Chr4	6861501	6861771	270	scaffold283	14590	14601	11	unconfirmed
1346	Chr4	7017077	7017222	145	scaffold105	152548	152563	15	unconfirmed
1347	Chr4	7076424	7076724	300	scaffold105	211837	211839	2	unconfirmed
1348	Chr4	7101316	7102109	793	scaffold105	238286	238290	4	confirmed
1349	Chr4	7140230	7140792	562	scaffold160	21751	21779	28	unconfirmed
1350	Chr4	7249033	7249597	564	scaffold149	40424	40427	3	confirmed
1351	Chr4	7298995	7299365	370	scaffold149	88361	88369	8	unconfirmed
1352	Chr4	7330571	7331079	508	scaffold149	121995	122000	5	confirmed
1353	Chr4	7407567	7407994	427	scaffold98	8348	8387	39	unconfirmed
1354	Chr4	7594716	7596213	1497	scaffold113	66125	66127	2	confirmed
1355	Chr4	7623834	7623992	158	scaffold113	93647	93647	0	unconfirmed
1356	Chr4	7639341	7640447	1106	scaffold113	109009	109040	31	confirmed
1357	Chr4	7759967	7760072	105	scaffold5208	49268	49315	47	unconfirmed
1358	Chr4	7812732	7814080	1348	scaffold5208	103415	103521	106	confirmed
1359	Chr4	7861297	7861506	209	scaffold5208	148598	148600	2	unconfirmed
1360	Chr4	7906001	7906369	368	scaffold76	1863	1867	4	confirmed
1361	Chr4	7951438	7951591	153	scaffold76	47730	47757	27	unconfirmed
1362	Chr4	8024672	8024863	191	scaffold76	141567	141616	49	confirmed
1363	Chr4	8287704	8287842	138	scaffold76	399191	399229	38	unconfirmed
1364	Chr4	8313840	8318843	5003	scaffold76	431244	431464	220	confirmed
1365	Chr4	8408354	8409135	781	scaffold76	526937	526948	11	confirmed
1366	Chr4	8458452	8458783	331	scaffold76	575346	575366	20	unconfirmed
1367	Chr4	8602323	8602906	583	scaffold74	38179	38236	57	confirmed
1368	Chr4	8644975	8645358	383	scaffold74	80462	80468	6	unconfirmed
1369	Chr4	8858703	8858912	209	scaffold74	296286	296292	6	unconfirmed
1370	Chr4	8901729	8907272	5543	scaffold74	337856	337870	14	confirmed
1371	Chr4	9317252	9317785	533	scaffold81	126998	127000	2	confirmed
1372	Chr4	9401720	9401995	275	scaffold81	214049	214062	13	unconfirmed
1373	Chr4	9422609	9423266	657	scaffold81	236270	236272	2	confirmed
1374	Chr4	9466191	9466404	213	scaffold81	275722	275742	20	unconfirmed
1375	Chr4	9492147	9495181	3034	scaffold81	303670	303693	23	confirmed
1376	Chr4	9498969	9499183	214	scaffold81	298881	298892	11	confirmed
1377	Chr4	9541355	9541634	279	scaffold81	294721	294764	43	confirmed
1378	Chr4	9791097	9791202	105	scaffold81	543611	543617	6	unconfirmed
1379	Chr4	9860631	9860941	310	scaffold81	607517	607520	3	confirmed
1380	Chr4	9861048	9861173	125	scaffold81	607518	607520	2	confirmed
1381	Chr4	10179476	10179854	378	scaffold81	915864	915866	2	unconfirmed
1382	Chr4	10341386	10341755	369	scaffold103	130188	130188	0	confirmed
1383	Chr4	10402549	10402701	152	scaffold103	189146	189148	2	unconfirmed
1384	Chr4	10684567	10686513	1946	scaffold5315	96247	96249	2	confirmed
1385	Chr4	10716552	10717043	491	scaffold5315	126204	126210	6	confirmed
1386	Chr4	10732389	10733009	620	scaffold5315	142568	142578	10	confirmed
1387	Chr4	10759845	10759986	141	scaffold5315	173020	173026	6	unconfirmed
1388	Chr4	10766965	10767313	348	scaffold5315	179987	179993	6	unconfirmed
1389	Chr4	10770229	10770401	172	scaffold5315	182576	182599	23	unconfirmed
1390	Chr4	10822168	10822370	202	scaffold5315	241403	241409	6	unconfirmed
1391	Chr4	10871083	10871388	305	scaffold5315	289749	289765	16	confirmed
1392	Chr4	10914792	10916366	1574	scaffold5315	328293	328399	106	confirmed
1393	Chr4	10919276	10919673	397	scaffold5315	331272	331288	16	unconfirmed
1394	Chr4	10994736	10994839	103	scaffold5316	23528	23528	0	confirmed
1395	Chr4	11124743	11125372	629	scaffold178	13716	13720	4	confirmed
1396	Chr4	11170281	11170618	337	scaffold178	57264	57293	29	unconfirmed
1397	Chr4	11416573	11417137	564	scaffold39	43417	43425	8	confirmed
1398	Chr4	11430457	11430655	198	scaffold39	56758	56771	13	unconfirmed
1399	Chr4	11751724	11752251	527	scaffold39	393489	393489	0	confirmed
1400	Chr4	12129314	12131466	2152	scaffold106	242548	242552	4	confirmed
1401	Chr4	12625370	12625498	128	scaffold78	368849	368866	17	unconfirmed
1402	Chr4	12841534	12841803	269	scaffold87	11440	11444	4	unconfirmed
1403	Chr4	12847580	12848425	845	scaffold87	17173	17175	2	confirmed
1404	Chr4	12892354	12892492	138	scaffold87	60980	60983	3	unconfirmed
1405	Chr4	12892651	12892758	107	scaffold87	60980	60983	3	unconfirmed
1406	Chr4	12948910	12949041	131	scaffold87	117397	117398	1	confirmed
1407	Chr4	12949237	12949362	125	scaffold87	117397	117398	1	confirmed
1408	Chr4	13316867	13317048	181	scaffold60	281971	281979	8	confirmed
1409	Chr4	13486875	13487039	164	scaffold60	451351	451353	2	unconfirmed
1410	Chr4	14979216	14981093	1877	scaffold23	137520	137521	1	confirmed
1411	Chr4	15066073	15066775	702	scaffold23	219984	219989	5	confirmed
1412	Chr4	16199969	16201392	1423	scaffold37	140987	140989	2	confirmed
1413	Chr4	17394195	17394332	137	scaffold40	315157	315158	1	unconfirmed
1414	Chr4	17555587	17555888	301	scaffold40	476726	476735	9	unconfirmed
1415	Chr4	17607935	17608129	194	scaffold40	530603	530606	3	unconfirmed
1416	Chr4	17637311	17638027	716	scaffold40	559826	559826	0	confirmed
1417	Chr4	18087208	18087443	235	scaffold40	1008813	1008820	7	unconfirmed
1418	Chr4	18100444	18100548	104	scaffold40	1021755	1021758	3	unconfirmed
1419	Chr4	18526369	18526596	227	scaffold62	282157	282205	48	unconfirmed
1420	Chr5	101939	102134	195	scaffold35	97917	97933	16	unconfirmed
1421	Chr5	288656	288962	306	scaffold35	282653	282677	24	N/A
1422	Chr5	498003	498107	104	scaffold21	144412	144458	46	unconfirmed
1423	Chr5	567316	567433	117	scaffold21	213603	213604	1	unconfirmed
1424	Chr5	600708	600826	118	scaffold21	246768	246769	1	unconfirmed
1425	Chr5	876023	876599	576	scaffold21	518590	518590	0	confirmed
1426	Chr5	1180508	1181393	885	scaffold2	157534	157548	14	confirmed
1427	Chr5	1515206	1516303	1097	scaffold2	493131	493132	1	confirmed
1428	Chr5	1688606	1691110	2504	scaffold2	661536	661709	173	confirmed
1429	Chr5	2088919	2089273	354	scaffold2	1057503	1057523	20	confirmed
1430	Chr5	2105893	2108048	2155	scaffold2	1074015	1074027	12	confirmed
1431	Chr5	2242904	2243115	211	scaffold2	1208391	1208424	33	unconfirmed
1432	Chr5	2257344	2262931	5587	scaffold2	1222723	1222741	18	confirmed
1433	Chr5	2290992	2291755	763	scaffold2	1250167	1250172	5	confirmed
1434	Chr5	3350062	3350340	278	scaffold5237	403164	403168	4	unconfirmed
1435	Chr5	3725380	3725485	105	scaffold5237	774678	774712	34	unconfirmed
1436	Chr5	3861842	3862101	259	scaffold5237	911319	911321	2	unconfirmed
1437	Chr5	4313605	4313875	270	scaffold5289	227566	227579	13	confirmed
1438	Chr5	4332805	4334694	1889	scaffold5237	1369175	1369181	6	confirmed
1439	Chr5	5217337	5220399	3062	scaffold5230	104065	104070	5	confirmed
1440	Chr5	5288854	5289147	293	scaffold5230	171777	171811	34	confirmed
1441	Chr5	5383332	5384290	958	scaffold5230	276359	276359	0	confirmed
1442	Chr5	5957769	5957892	123	scaffold5230	839957	839999	42	N/A
1443	Chr5	5964681	5965334	653	scaffold5230	846800	846838	38	confirmed
1444	Chr5	6073023	6073208	185	scaffold5230	954827	954847	20	confirmed
1445	Chr5	6403480	6408195	4715	scaffold5230	1275720	1275725	5	confirmed
1446	Chr5	6499117	6499239	122	scaffold5230	1366776	1366807	31	unconfirmed
1447	Chr5	6632467	6632610	143	scaffold177	65685	65703	18	confirmed
1448	Chr5	6889656	6889820	164	scaffold5230	1752978	1752983	5	unconfirmed
1449	Chr5	6919554	6919686	132	scaffold5230	1778966	1778975	9	confirmed
1450	Chr5	6926172	6926316	144	scaffold5230	1785217	1785224	7	confirmed
1451	Chr5	7031632	7031739	107	scaffold143	47860	47861	1	unconfirmed
1452	Chr5	7114357	7115544	1187	scaffold5230	1961073	1961141	68	confirmed
1453	Chr5	7268614	7268730	116	scaffold5230	2114826	2114829	3	unconfirmed
1454	Chr5	7300696	7301054	358	scaffold5230	2147425	2147461	36	unconfirmed
1455	Chr5	7344430	7344742	312	scaffold5230	2193561	2193577	16	confirmed
1456	Chr5	7513585	7515002	1417	scaffold5230	2372489	2372492	3	confirmed
1457	Chr5	7701049	7701179	130	scaffold5230	2571616	2571626	10	confirmed
1458	Chr5	7739128	7739386	258	scaffold5230	2607156	2607158	2	unconfirmed
1459	Chr5	7752818	7753192	374	scaffold5230	2621938	2621941	3	confirmed
1460	Chr5	7825727	7825959	232	scaffold5230	2697120	2697122	2	unconfirmed
1461	Chr5	7828836	7830282	1446	scaffold5230	2699993	2700117	124	confirmed
1462	Chr5	7956629	7957037	408	scaffold5230	2830984	2831014	30	confirmed
1463	Chr5	7997547	7997709	162	scaffold5230	2871692	2871736	44	N/A
1464	Chr5	8085132	8090353	5221	scaffold5230	2962131	2962150	19	confirmed
1465	Chr5	8101409	8101657	248	scaffold186	6394	6399	5	confirmed
1466	Chr5	8123273	8123401	128	scaffold186	26752	26761	9	confirmed
1467	Chr5	8311047	8311186	139	scaffold66	16439	16442	3	unconfirmed
1468	Chr5	8404442	8404642	200	scaffold66	105811	105819	8	confirmed
1469	Chr5	8404685	8404824	139	scaffold66	105811	105819	8	confirmed
1470	Chr5	8419468	8421579	2111	scaffold66	121739	121848	109	confirmed
1471	Chr5	8425677	8427272	1595	scaffold66	125946	126069	123	confirmed
1472	Chr5	8502982	8506882	3900	scaffold66	208597	208602	5	confirmed
1473	Chr5	8563629	8563806	177	scaffold66	263838	263844	6	unconfirmed
1474	Chr5	8571514	8577926	6412	scaffold66	271562	271657	95	confirmed
1475	Chr5	8665720	8666089	369	scaffold36	52964	52977	13	confirmed
1476	Chr5	8700317	8702303	1986	scaffold36	87909	88094	185	confirmed
1477	Chr5	8819462	8819597	135	scaffold36	209242	209243	1	confirmed
1478	Chr5	8819725	8819878	153	scaffold36	209242	209243	1	confirmed
1479	Chr5	8873347	8873889	542	scaffold36	258901	258911	10	confirmed
1480	Chr5	8939263	8939370	107	scaffold36	317594	317598	4	unconfirmed
1481	Chr5	9166063	9167205	1142	scaffold155	62592	62594	2	confirmed
1482	Chr5	9232524	9232655	131	scaffold5204	10102	10112	10	unconfirmed
1483	Chr5	9244644	9244748	104	scaffold5204	22084	22104	20	unconfirmed
1484	Chr5	9247746	9247872	126	scaffold5204	25100	25142	42	unconfirmed
1485	Chr5	9471774	9472183	409	scaffold223	8598	8604	6	confirmed
1486	Chr5	9560538	9561208	670	scaffold319	24388	24390	2	confirmed
1487	Chr5	9640955	9644581	3626	scaffold5217	54844	54852	8	confirmed
1488	Chr5	9794260	9794552	292	scaffold130	83530	83531	1	unconfirmed
1489	Chr5	9945284	9945402	118	scaffold130	216540	216554	14	N/A
1490	Chr5	10019076	10019910	834	scaffold130	306136	306139	3	confirmed
1491	Chr5	10116735	10116905	170	scaffold297	32312	32316	4	unconfirmed
1492	Chr5	10174411	10177465	3054	scaffold310	32836	32837	1	confirmed
1493	Chr5	10284367	10285287	920	scaffold187	13637	13639	2	confirmed
1494	Chr5	10351618	10351740	122	scaffold203	4016	4023	7	unconfirmed
1495	Chr5	10418634	10421547	2913	scaffold187	84628	84629	1	confirmed
1496	Chr5	10563533	10563894	361	scaffold140	39932	39938	6	confirmed
1497	Chr5	10572259	10572569	310	scaffold140	48780	48828	48	unconfirmed
1498	Chr5	10578776	10578895	119	scaffold140	55161	55163	2	unconfirmed
1499	Chr5	10614281	10614734	453	scaffold135	7592	7597	5	confirmed
1500	Chr5	10615199	10615761	562	scaffold135	8055	8056	1	confirmed
1501	Chr5	10615803	10616520	717	scaffold135	8055	8056	1	confirmed
1502	Chr5	10827939	10828370	431	scaffold225	620	623	3	confirmed
1503	Chr5	11347223	11347383	160	scaffold855	1530	1536	6	confirmed
1504	Chr5	13366872	13367123	251	scaffold208	61620	61622	2	unconfirmed
1505	Chr5	13417747	13417852	105	scaffold312	20553	20563	10	confirmed
1506	Chr5	13578367	13579791	1424	scaffold157	35669	35731	62	confirmed
1507	Chr5	13683561	13684698	1137	scaffold157	134686	134745	59	confirmed
1508	Chr5	13694886	13695289	403	scaffold157	144927	144929	2	confirmed
1509	Chr5	13816958	13817117	159	scaffold165	78381	78421	40	unconfirmed
1510	Chr5	14567970	14569733	1763	scaffold161	18546	18547	1	confirmed
1511	Chr5	14626587	14626763	176	scaffold161	78213	78221	8	unconfirmed
1512	Chr5	14739924	14740430	506	scaffold161	191849	191855	6	confirmed
1513	Chr5	14799633	14799919	286	scaffold161	251357	251363	6	unconfirmed
1514	Chr5	14926425	14927209	784	scaffold161	392513	392552	39	confirmed
1515	Chr5	14938140	14938478	338	scaffold161	403472	403473	1	unconfirmed
1516	Chr5	15049363	15049782	419	scaffold161	512588	512592	4	confirmed
1517	Chr5	15053735	15055190	1455	scaffold161	516638	516726	88	N/A
1518	Chr5	15072761	15073018	257	scaffold161	534166	534199	33	unconfirmed
1519	Chr5	15096993	15097137	144	scaffold161	545538	545552	14	unconfirmed
1520	Chr5	15106250	15106544	294	scaffold161	562468	562477	9	confirmed
1521	Chr5	15192796	15193193	397	scaffold255	26801	26803	2	confirmed
1522	Chr5	15201956	15202558	602	scaffold125	6208	6223	15	confirmed
1523	Chr5	15229198	15229464	266	scaffold125	35204	35220	16	unconfirmed
1524	Chr5	15325641	15325807	166	scaffold125	116396	116438	42	unconfirmed
1525	Chr5	15646198	15650270	4072	scaffold125	424165	424170	5	confirmed
1526	Chr5	15982208	15983339	1131	scaffold5243	57640	57647	7	confirmed
1527	Chr5	16049696	16049797	101	scaffold5243	126515	126544	29	confirmed
1528	Chr5	16117686	16117859	173	scaffold5205	67552	67558	6	unconfirmed
1529	Chr5	16395718	16398950	3232	scaffold5205	349884	349897	13	confirmed
1530	Chr5	16480782	16481003	221	scaffold5205	433126	433126	0	confirmed
1531	Chr5	16481028	16481194	166	scaffold5205	433126	433126	0	confirmed
1532	Chr5	16491029	16491353	324	scaffold5205	442588	442589	1	confirmed
1533	Chr5	16550550	16550944	394	scaffold97	40908	40911	3	confirmed
1534	Chr5	17552578	17552722	144	scaffold75	67827	67836	9	unconfirmed
1535	Chr5	17573538	17573788	250	scaffold75	88508	88526	18	unconfirmed
1536	Chr5	17581481	17581584	103	scaffold75	95140	95143	3	unconfirmed
1537	Chr5	17591973	17592097	124	scaffold75	105595	105609	14	unconfirmed
1538	Chr5	17627891	17628001	110	scaffold75	130848	130886	38	unconfirmed
1539	Chr5	17644362	17644658	296	scaffold75	146964	146968	4	unconfirmed
1540	Chr5	17646330	17646583	253	scaffold75	148658	148660	2	unconfirmed
1541	Chr5	17743160	17743261	101	scaffold75	245996	245997	1	unconfirmed
1542	Chr5	17753242	17754041	799	scaffold75	256000	256010	10	confirmed
1543	Chr5	17881732	17881970	238	scaffold56	29040	29043	3	unconfirmed
1544	Chr5	17905137	17906463	1326	scaffold56	44074	44079	5	confirmed
1545	Chr5	18124377	18124524	147	scaffold142	83744	83780	36	confirmed
1546	Chr5	18207323	18209067	1744	scaffold56	326987	326996	9	confirmed
1547	Chr5	18233381	18238491	5110	scaffold56	352279	352368	89	confirmed
1548	Chr5	18258405	18260270	1865	scaffold56	372347	372430	83	confirmed
1549	Chr5	18293574	18293872	298	scaffold56	414859	414866	7	confirmed
1550	Chr5	18665239	18665458	219	scaffold18	85218	85222	4	unconfirmed
1551	Chr5	18727032	18727144	112	scaffold18	151577	151579	2	unconfirmed
1552	Chr5	18737763	18737871	108	scaffold18	165755	165761	6	unconfirmed
1553	Chr5	18781983	18782137	154	scaffold18	212420	212458	38	unconfirmed
1554	Chr5	18786542	18786869	327	scaffold18	216860	216861	1	unconfirmed
1555	Chr5	19683055	19683255	200	scaffold18	1094214	1094214	0	unconfirmed
1556	Chr5	19772692	19779993	7301	scaffold18	1185759	1186123	364	unconfirmed
1557	Chr5	19830049	19830333	284	scaffold18	1236734	1236736	2	unconfirmed
1558	Chr5	19832448	19832637	189	scaffold18	1238846	1238849	3	unconfirmed
1559	Chr5	20048406	20049583	1177	scaffold169	842	856	14	confirmed
1560	Chr5	20096660	20096808	148	scaffold169	48053	48057	4	unconfirmed
1561	Chr5	21680484	21680668	184	scaffold28	513787	513798	11	unconfirmed
1562	Chr5	21923943	21924255	312	scaffold28	756779	756806	27	confirmed
1563	Chr5	21959500	21959857	357	scaffold28	789179	789183	4	confirmed
1564	Chr5	22164122	22165147	1025	scaffold28	996570	996573	3	confirmed
1565	Chr5	23336612	23336828	216	scaffold5227	717321	717338	17	unconfirmed
1566	Chr5	23750263	23750407	144	scaffold5228	211737	211737	0	unconfirmed
1567	Chr5	23995940	23996087	147	scaffold5228	455677	455715	38	unconfirmed
1568	Chr5	25344796	25345001	205	scaffold5228	1801232	1801239	7	unconfirmed
1569	Chr5	25528797	25529153	356	scaffold5228	1985485	1985488	3	confirmed
1570	Chr5	25687707	25687866	159	scaffold5228	2146270	2146274	4	unconfirmed
1571	Chr5	25860430	25860658	228	scaffold5220	1596	1597	1	confirmed
1572	Chr5	26617270	26617372	102	scaffold59	9007	9013	6	unconfirmed
